# Supplementary material for: Identification and characterization of aging/senescence-induced genes in osteosarcoma and predicting clinical prognosis
Source: Front Immunol. 2022 Oct 5;13:997765. doi: 10.3389/fimmu.2022.997765 (PMC9579318; doi:10.3389/fimmu.2022.997765)
Supplement: Supplementary Table 7 — List of genes used for CMap analysis and CMap score of all drugs. [file Table_7.xlsx]

## Sheet: CMAP_import
up	dn
COL2A1	PLAC8
LECT1	CIDEC
CHRDL2	GLT1D1
PENK	ATP2A3
COL9A1	TMEM132C
CAPN6	C19orf38
FGFBP2	BEST3
SSX1	MEPE
COL9A3	BGLAP
IL17B	TF
MIA	PDE6H
MATN1	YPEL4
AMBN	KLK3
SCGB3A2	SLC26A8
CLEC3A	CDH1
HAPLN1	UGT2B11
SCRG1	OR2W3
UGT1A8	TMEM56
UGT1A4	CEACAM4
UGT1A5	WIF1
UGT1A9	FCRLA
UGT1A1	LYZ
UGT1A7	OR6N2
UGT1A10	BTNL8
KRT17	THBS4
UGT1A3	SLC22A4
PRL	CFP
COL10A1	CEACAM1
IGFL3	TARM1
UGT1A6	MFSD2B
GJB2	CR1L
CNTN5	EMR3
TAC1	RAG1
CES1	TCAP
PI15	MS4A1
EGFL6	CD5L
AKR1B10	PPBP
MATN3	NCF1
COL9A2	C19orf77
CYP4F11	DEFB1
LOC100292680	ADD2
SNORA5A	EPB49
KCNJ16	FCAR
CXCL13	CD79B
KERA	HMBS
S100A1	SNCA
SERPINB5	CST7
NBPF4	GP1BA
CST1	RAG2
ADH7	SLCO4C1
SOX2OT	PRG4
PTHLH	GYPE
MMP1	GFI1
SFN	PDZK1IP1
F2RL2	CHL1
PANX3	SLC25A37
DSC3	VNN3
SPINK1	GPR97
NRG1	FAM129C
CXCL5	COL17A1
COMP	SLC22A16
TAG	ANKRD18A
FAM180A	RETN
ALDH3A1	ITGA2B
AKR1C1	TUBB1
CABYR	FAM46C
NDUFA4L2	TSPO2
MMP11	SAA4
MAGEA1	HEPACAM2
FCGR1C	CLEC1B
C13orf16	DEFA5
FMO1	OR12D2
CA9	BEX1
CXCL14	MIR223
COL11A1	ABCA10
CCL19	CLEC12A
NBPF6	GATA1
SLC7A11	TAL1
PERP	APOA2
RPPH1	CRABP1
PPP1R1C	PRAM1
SNORA71A	FCRL1
IL13RA2	FCN1
ACAN	MYL4
MIR147B	IGLL1
S100A2	VAT1L
C4orf7	SPTB
PRAME	XK
FLJ21408	HP
RDH10	CLEC4D
C1QTNF3	AOX2P
PAGE5	C17orf99
SLC38A11	TRIM58
DSG3	CDA
DMRT3	ANKLE1
CLCA2	CRISP2
GPX2	ECRP
WNT5A	SAA2
HOXD11	SAA1
CCL26	ORM1
TDO2	S100P
PTGES	GFI1B
MAGEA3	ART4
CA12	PF4
MFI2	ANK1
TGFBI	RHD
HSPB6	MYB
CRISPLD1	HBG2
ITIH5L	NFE2
LAMA1	VPREB1
BCL8	S100A9
ZNF560	VSTM1
VSNL1	TCL1A
CDKN2A	DNTT
LY6K	MGAM
NRK	AZU1
MFAP2	CTSG
EPYC	C19orf59
NEFM	SPTA1
CXCL10	ACSL6
IL8	HBA2
MAGEA6	PADI4
NQO1	SLFN14
TREM2	IFIT1B
SQLE	CTSE
SNORD49B	ANXA3
PLAU	TRIM10
MFAP5	HBB
STC2	HBG1
NDST4	ALAS2
AKR1C2	KLF1
TPTE	PGLYRP1
ABCA4	FOLR3
ANXA10	KEL
ECM1	CD177
GABRA3	PRTN3
MOXD1	SERPINB10
HHIP	VPREB3
BAGE4	HBM
BAGE5	OLFM4
PDPN	EPX
TP63	RNASE2
KAL1	HBA1
GLT25D2	ARG1
VEGFA	CA1
TAC3	DEFA1B_dup3
C7orf68	DEFA3
EPGN	DEFA1_dup3
EPHB2	PRG2
MGC4473	SLC4A1
PCDHB2	S100A8
KYNU	GYPA
RIPK4	PRG3
IQCA1	CEACAM6
AKR1C3	TCN1
GPC1	ELANE
EGLN3	CRISP3
UCHL1	CLC
FCGBP	EPB42
CBR1	RHAG
TREML3	CEACAM8
SLC38A3	LTF
ULBP2	HBD
MATN4	HEMGN
MLLT11	MMP8
BAGE3	MPO
BAGE2	MS4A3
DSG2	BPI
MFAP4	GYPB
TMEM155	DEFA4
MMP12	AHSP
LGR5	S100A12
LHX2	RNASE3
C11orf92	CAMP
AK4	LCN2

## Sheet: CMAP_score
Rank	Score	Type	ID	Name	Description
8553	-97.03	cp	BRD-A23637604	oxymetholone	Androgen receptor agonist
8551	-96.37	cp	BRD-K02407574	parbendazole	Tubulin inhibitor
8550	-96.35	cp	BRD-K86003836	flubendazole	Tubulin inhibitor
8547	-94.23	cp	BRD-A62182663	YK-4279	Apoptosis stimulant
8535	-92.61	cp	BRD-A91555231	norepinephrine	Adrenergic receptor agonist
8532	-91.98	cp	BRD-K77008974	WYE-354	MTOR inhibitor
8522	-89.29	cp	BRD-K71035033	masitinib	KIT inhibitor
8519	-89.11	cp	BRD-A68930007	ouabain	ATPase inhibitor
8516	-88.57	cp	BRD-K61323504	SB-225002	CC chemokine receptor antagonist
8515	-88.55	cp	BRD-K51318897	fenbendazole	Tubulin inhibitor
8513	-87.74	cp	BRD-K63606607	bufalin	ATPase inhibitor
8509	-85.84	cp	BRD-A90131694	alclometasone	Glucocorticoid receptor agonist
8504	-84.96	cp	BRD-K79131256	albendazole	Anthelmintic
8503	-84.88	cp	BRD-K43978949	PIT	Purinergic receptor antagonist
8498	-83.88	cp	BRD-K12539581	nocodazole	Tubulin inhibitor
8497	-83.82	cp	BRD-K26997899	SA-792574	Microtubule inhibitor
8494	-83.38	cp	BRD-A15297126	fluocinonide	Glucocorticoid receptor agonist
8491	-82.64	cp	BRD-A36707673	hydroxycholesterol	LXR agonist
8490	-82.55	cp	BRD-A94756469	digoxin	ATPase inhibitor
8489	-82.32	cp	BRD-A93236127	digitoxin	ATPase inhibitor
8484	-81.59	cp	BRD-A60197193	amisulpride	Dopamine receptor antagonist
8480	-80.89	cp	BRD-K90543092	levonorgestrel	Estrogen receptor agonist
8478	-80.79	cp	BRD-A17065207	brefeldin-a	Protein synthesis inhibitor
8477	-80.67	cp	BRD-K49519144	LY-2140023	Glutamate receptor agonist
8476	-80.44	cp	BRD-K18518344	digitoxigenin	ATPase inhibitor
8468	-79.43	cp	BRD-K80348542	cephaeline	Protein synthesis inhibitor
8465	-79.26	cp	BRD-K41859756	NVP-AUY922	HSP inhibitor
8466	-79.26	cp	BRD-K71926323	marbofloxacin	Bacterial DNA gyrase inhibitor
8461	-78.23	cp	BRD-K46137903	prednicarbate	Phospholipase activator
8460	-77.87	cp	BRD-K64857848	XMD-885	Leucine rich repeat kinase inhibitor
8451	-77.11	cp	BRD-A01346607	flumetasone	Glucocorticoid receptor agonist
8448	-76.73	cp	BRD-A07000685	hydrocortisone	Glucocorticoid receptor agonist
8447	-76.71	cp	BRD-A56675431	altizide	Thiazide diuretic
8441	-75.74	cp	BRD-K05977823	tenovins	SIRT inhibitor
8430	-74.19	cp	BRD-K97330509	SRC-kinase-inhibitor-II	SRC inhibitor
8428	-74.06	cp	BRD-A42628519	iopanoic-acid	Radiopaque medium
8425	-73.66	cp	BRD-K97365803	PI-828	PI3K inhibitor
8424	-73.49	cp	BRD-A49765801	fludroxycortide	Glucocorticoid receptor agonist
8422	-73.26	cp	BRD-A45498368	WYE-125132	MTOR inhibitor
8421	-73.16	cp	BRD-A38749782	fludrocortisone	Glucocorticoid receptor agonist
8418	-72.99	cp	BRD-K64451768	GANT-58	GLI antagonist
8419	-72.99	cp	BRD-K05464208	JX-401	p38 MAPK inhibitor
8416	-72.94	cp	BRD-K71823332	epothilone-a	Microtubule stabilizing agent
8411	-72.19	cp	BRD-A27887842	prednisolone	Glucocorticoid receptor agonist
8408	-72.06	cp	BRD-K12120659	GR-144053	Integrin antagonist
8407	-72	cp	BRD-K40227168	vinburnine	Adrenergic receptor antagonist
8405	-71.59	cp	BRD-K91623615	ABT-751	Tubulin inhibitor
8402	-71.47	cp	BRD-A07765530	epinephrine	carbonic anhydrase activator
8397	-71.14	cp	BRD-K59753975	vindesine	Tubulin inhibitor
8396	-71.04	cp	BRD-A62184259	cycloheximide	Protein synthesis inhibitor
8394	-70.7	cp	BRD-U01690642	acetyl-geranyl-cysteine	Isoprenylated protein methylation inhibitor
8388	-69.36	cp	BRD-A34806832	proscillaridin	ATPase inhibitor
8385	-68.77	cp	BRD-K63150726	JTE-907	Cannabinoid receptor inverse agonist
8384	-68.52	cp	BRD-K28428262	brivanib	FGFR inhibitor
8357	-65.17	cp	BRD-A14985772	ascorbyl-palmitate	antioxidant
8346	-63.87	cp	BRD-K91370081	anisomycin	DNA synthesis inhibitor
8345	-63.72	cp	BRD-A13133631	fluorometholone	Glucocorticoid receptor agonist
8333	-62.54	cp	BRD-K76674262	homoharringtonine	Protein synthesis inhibitor
8330	-62.1	cp	BRD-A21858158	praziquantel	Anthelmintic
8319	-60.91	cp	BRD-K71003802	hippeastrine	Plant alkaloid
8314	-60.56	cp	BRD-K12260308	xanthoxyline	Antifungal
8312	-60.55	cp	BRD-K29582115	ziprasidone	Dopamine receptor antagonist
8310	-60.48	cp	BRD-A65615053	zacopride	Serotonin receptor antagonist
8309	-60.46	cp	BRD-K19284129	salvinorin-a	Opioid receptor agonist
8306	-60.34	cp	BRD-A68631409	evodiamine	ATPase inhibitor
8295	-59.4	cp	BRD-K12502280	TG-101348	FLT3 inhibitor
8293	-59.2	cp	BRD-K83010055	VU-0415374-1	Glutamate receptor modulator
8288	-58.62	cp	BRD-A89672324	CGP-55845	GABA receptor antagonist
8285	-58.4	cp	BRD-K59650319	YM-298198	Glutamate receptor antagonist
8281	-57.75	cp	BRD-K95739795	tetrabenazine	Vesicular monoamine transporter inhibitor
8280	-57.59	cp	BRD-A60070924	alpha-estradiol	Estrogen receptor agonist
8279	-57.54	cp	BRD-K30197592	5-methoxytryptamine	Serotonin receptor agonist
8272	-57.12	cp	BRD-A46186775	hydrocortisone	Glucocorticoid receptor agonist
8268	-56.82	cp	BRD-K53972329	ruxolitinib	JAK inhibitor
8267	-56.8	cp	BRD-A62035778	scopolamine	Acetylcholine receptor antagonist
8262	-56.39	cp	BRD-K41160163	fenobam	Glutamate receptor antagonist
8261	-56.38	cp	BRD-K47943470	tyrphostin-51	EGFR inhibitor
8256	-55.52	cp	BRD-K27184429	levocetirizine	Histamine receptor antagonist
8251	-54.84	cp	BRD-K83637872	SANT-1	Smoothened receptor antagonist
8246	-54.6	cp	BRD-K29173907	isoflupredone	Glucocorticoid receptor agonist
8242	-54.57	cp	BRD-K04046242	equilin	Estrogen receptor agonist
8240	-54.44	cp	BRD-K56614220	clofazimine	GK0582 inhibitor
8237	-54.15	cp	BRD-K84595254	strophanthidin	ATPase inhibitor
8233	-53.94	cp	BRD-K19605405	ZM-241385	Adenosine receptor antagonist
8230	-53.69	cp	BRD-K14791739	fluticasone	Glucocorticoid receptor agonist
8226	-53.42	cp	BRD-K38055836	etamivan	Respiratory stimulant
8219	-53.04	cp	BRD-K67868012	PI-103	MTOR inhibitor
8217	-52.86	cp	BRD-K82731415	olomoucine	CDK inhibitor
8213	-52.66	cp	BRD-K14767410	SC-560	Cyclooxygenase inhibitor
8206	-52.13	cp	BRD-K23875128	RHO-kinase-inhibitor-III[rockout]	Rho associated kinase inhibitor
8204	-51.99	cp	BRD-A09539288	homatropine	Acetylcholine receptor antagonist
8199	-51.74	cp	BRD-A35989968	megestrol	Progesterone receptor agonist
8197	-51.65	cp	BRD-K44779798	miglitol	Glucosidase inhibitor
8196	-51.62	cp	BRD-K41337261	ZM-306416	ABL inhibitor
8192	-51.12	cp	BRD-A45333398	periplocymarin	Apoptosis stimulant
8184	-50.58	cp	BRD-K34014345	naproxol	Anti-inflammatory
8183	-50.5	cp	BRD-K78280988	anandamide	Cannabinoid receptor agonist
8180	-50.02	cp	BRD-K45542189	diethylcarbamazine	Lipoxygenase inhibitor
8178	-49.81	cp	BRD-A25687296	emetine	Protein synthesis inhibitor
8177	-49.78	cp	BRD-K47869605	podophyllotoxin	Microtubule inhibitor
8175	-49.77	cp	BRD-K02715688	hydrastine	Tyrosine hydroxylase inhibitor
8173	-49.73	cp	BRD-K50325075	UCL-2077	Slow after hyperpolarization channel blocker
8166	-49.26	cp	BRD-K32828673	chelidonine	Tubulin inhibitor
8163	-49.03	cp	BRD-A70449690	forskolin	Adenylyl cyclase activator
8161	-49.02	cp	BRD-K87510569	RS-504393	CC chemokine receptor antagonist
8154	-47.99	cp	BRD-A92177080	betamethasone	Glucocorticoid receptor agonist
8153	-47.63	cp	BRD-K74236984	UNC-0321	Histone lysine methyltransferase inhibitor
8151	-47.34	cp	BRD-K63516691	T-0156	Phosphodiesterase inhibitor
8149	-47.27	cp	BRD-K56301217	ABT-737	BCL inhibitor
8147	-46.96	cp	BRD-K20995441	U-54494A	Opioid receptor agonist
8143	-46.63	cp	BRD-K28453807	nitrocaramiphen	Cholinergic receptor antagonist
8136	-46.3	cp	BRD-A09495397	bicuculline	GABA receptor antagonist
8137	-46.3	cp	BRD-K10573841	tunicamycin	GLCNAC phosphotransferase inhibitor
8135	-46.13	cp	BRD-K04887706	AKT-inhibitor-1-2	AKT inhibitor
8128	-45.4	cp	BRD-A89434049	sarmentogenin	ATPase inhibitor
8125	-45.26	cp	BRD-A65440446	cimaterol	Adrenergic receptor agonist
8123	-45.14	cp	BRD-K87226815	cycloserine	Bacterial cell wall synthesis inhibitor
8119	-44.63	cp	BRD-K84141129	VU-0400193-3	Glutamate receptor modulator
8118	-44.62	cp	BRD-A34208323	VU-0404997-2	Glutamate receptor modulator
8117	-44.56	cp	BRD-K66093087	FGIN-1-43	Benzodiazepine receptor agonist
8116	-44.4	cp	BRD-K61993165	niacin	NAD precursor with lipid lowering effects
8115	-44.37	cp	BRD-K70883034	nimetazepam	GABA receptor agonist
8113	-44.12	cp	BRD-K35687265	ON-01910	PLK inhibitor
8110	-43.57	cp	BRD-K17349619	HLI-373	MDM inhibitor
8107	-43.41	cp	BRD-K93918653	quizartinib	FLT3 inhibitor
8104	-43.2	cp	BRD-K99451608	lopinavir	HIV protease inhibitor
8101	-42.99	cp	BRD-K71266197	PSB-06126	NTPDase inhibitor
8098	-42.92	cp	BRD-K67102207	phenylbutyrate	HDAC inhibitor
8097	-42.9	cp	BRD-K08924299	palonosetron	Serotonin receptor antagonist
8096	-42.89	cp	BRD-K84266862	BRL-50481	Phosphodiesterase inhibitor
8095	-42.79	cp	BRD-A26002865	verrucarin-a	Protein synthesis inhibitor
8088	-42.29	cp	BRD-A84493640	atovaquone	Mitochondrial electron transport inhibitor
8087	-42.19	cp	BRD-A29437505	RWJ-21757	TLR agonist
8086	-42.17	cp	BRD-K70505054	ranitidine	Histamine receptor antagonist
8080	-41.74	cp	BRD-K36395411	SB-206553	Serotonin receptor antagonist
8072	-41.23	cp	BRD-A77050075	heraclenol	Vitamin K antagonist
8071	-41.15	cp	BRD-K63784565	BRD-K63784565	Topoisomerase inhibitor
8069	-40.99	cp	BRD-K94176593	TWS-119	Glycogen synthase kinase inhibitor
8068	-40.96	cp	BRD-A99177642	deltaline	Acetylcholine receptor antagonist
8066	-40.85	cp	BRD-K11696279	BU-239	Imidazoline receptor agonist
8059	-40.41	cp	BRD-K15842202	eudesmic-acid	-666
8057	-40.29	cp	BRD-K07736136	VX-702	p38 MAPK inhibitor
8055	-40.03	cp	BRD-A51393488	noscapine	Bradykinin receptor antagonist
8054	-39.96	cp	BRD-K68336408	tyrphostin-AG-1478	EGFR inhibitor
8048	-39.32	cp	BRD-K62858456	lomerizine	Calcium channel blocker
8047	-39.12	cp	BRD-K37447567	hydrocotarnine	Opioid receptor antagonist
8038	-38.62	cp	BRD-A35108200	dexamethasone	Glucocorticoid receptor agonist
8035	-38.4	cp	BRD-A61858259	CAY-10415	Insulin sensitizer
8034	-38.38	cp	BRD-K52075715	oxibendazole	Tubulin inhibitor
8032	-38.32	cp	BRD-K61737877	VEGF-receptor-2-kinase-inhibitor-IV	VEGFR inhibitor
8023	-37.86	cp	BRD-K50384076	7,4'-dihydroxyflavone	Opioid receptor antagonist
8024	-37.86	cp	BRD-K34508425	KUC103898N	-666
8021	-37.73	cp	BRD-A65449987	flunisolide	Cytochrome P450 inhibitor
8014	-37.43	cp	BRD-A76279427	myriocin	Serine palmitoyltransferase inhibitor
8011	-37.18	cp	BRD-M64432851	sunitinib	FLT3 inhibitor
8007	-36.71	cp	BRD-K55748775	SCH-28080	ATPase inhibitor
8004	-36.54	cp	BRD-K85266041	DNQX	Glutamate receptor antagonist
8002	-36.4	cp	BRD-K44084986	Y-27632	Rho associated kinase inhibitor
7996	-35.91	cp	BRD-K06878038	deferiprone	Chelating agent
7997	-35.91	cp	BRD-A71459254	cymarin	ATPase inhibitor
7994	-35.88	cp	BRD-K03406345	azacitidine	DNA methyltransferase inhibitor
7993	-35.87	cp	BRD-A80574334	oxalomalic-acid	Isocitrate dehydrogenase inhibitor
7992	-35.83	cp	BRD-A92439610	triamcinolone	Glucocorticoid receptor agonist
7991	-35.78	cp	BRD-A53952395	prilocaine	Local anesthetic
7990	-35.73	cp	BRD-A26095496	clobetasol	Glucocorticoid receptor agonist
7989	-35.71	cp	BRD-A17411484	carprofen	Cyclooxygenase inhibitor
7988	-35.58	cp	BRD-K14681867	somatostatin	Somatostatin receptor agonist
7981	-35.42	cp	BRD-K99411983	lumicolchicine	Colchicine isomer, non-binder of microtubules
7982	-35.42	cp	BRD-A44551378	LFM-A12	EGFR inhibitor
7978	-35.16	cp	BRD-A31227688	kynuramine	Aryl hydrocarbon receptor activator
7977	-35.12	cp	BRD-K99818283	PIK-90	PI3K inhibitor
7976	-35.11	cp	BRD-K76064317	tyrphostin-AG-1296	FLT3 inhibitor
7972	-35.01	cp	BRD-A90515964	guaifenesin	Expectorant
7970	-34.99	cp	BRD-K18678457	ZD-7288	HCN channel blocker
7967	-34.89	cp	BRD-K62310379	fluticasone	Glucocorticoid receptor agonist
7965	-34.68	cp	BRD-A69917777	aminopentamide	Acetylcholine receptor antagonist
7961	-34.15	cp	BRD-A92826379	lupanine	Sodium channel blocker
7960	-34.11	cp	BRD-K54095730	CMPD-1	p38 MAPK inhibitor
7957	-34.03	cp	BRD-K82746043	navitoclax	BCL inhibitor
7953	-33.68	cp	BRD-K64517075	heliomycin	ATP synthase inhibitor
7952	-33.47	cp	BRD-K70330367	amantadine	Glutamate receptor antagonist
7943	-33.14	cp	BRD-K18895904	olanzapine	Dopamine receptor antagonist
7936	-32.74	cp	BRD-K84996949	sinensetin	Cyclooxygenase inhibitor
7931	-32.59	cp	BRD-A28970875	puromycin	Protein synthesis inhibitor
7928	-32.21	cp	BRD-A10715913	sulpiride	Dopamine receptor antagonist
7926	-32.03	cp	BRD-A41995253	brucine	Glycine receptor antagonist
7918	-31.5	cp	BRD-K50720187	flupirtine	Glutamate receptor antagonist
7916	-31.38	cp	BRD-K91696562	orantinib	FGFR inhibitor
7914	-31.34	cp	BRD-K82109576	vincristine	Tubulin inhibitor
7907	-30.9	cp	BRD-K77133231	PD-169316	p38 MAPK inhibitor
7896	-30.39	cp	BRD-K42452249	EO-1428	p38 MAPK inhibitor
7894	-30.32	cp	BRD-A71009679	KUC103420N	-666
7893	-30.27	cp	BRD-K83508485	FK-888	Tachykinin antagonist
7885	-29.78	cp	BRD-K14807180	SB-221284	Serotonin receptor antagonist
7886	-29.78	cp	BRD-K67860401	AR-A014418	Glycogen synthase kinase inhibitor
7884	-29.73	cp	BRD-K33226500	indinavir	HIV protease inhibitor
7883	-29.71	cp	BRD-A67438293	treprostinil	Prostacyclin analog
7881	-29.59	cp	BRD-A84189516	baccatin-III	Paclitaxel precursor
7880	-29.58	cp	BRD-K18250272	propoxycaine	Local anesthetic
7879	-29.57	cp	BRD-U68942961	JW-7-24-1	LCK Inhibitor
7874	-29.34	cp	BRD-A42553870	L-152804	Neuropeptide receptor antagonist
7869	-28.98	cp	BRD-K29530284	amlexanox	Histamine receptor modulator
7868	-28.92	cp	BRD-K51575138	TPCA-1	IKK inhibitor
7865	-28.88	cp	BRD-K65503129	HSP90-inhibitor	HSP inhibitor
7864	-28.87	cp	BRD-K01555864	dibenzoylmethane	Antineoplastic
7861	-28.61	cp	BRD-K08554278	bisbenzimide	DNA binding agent
7860	-28.6	cp	BRD-A23290232	westcort	Glucocorticoid receptor agonist
7859	-28.59	cp	BRD-K18619710	digoxigenin	Steroid
7853	-28.38	cp	BRD-U86922168	QL-XII-47	BTK inhibitor
7852	-28.36	cp	BRD-K69690935	curcumin	Cyclooxygenase inhibitor
7849	-28.31	cp	BRD-K32398298	alprazolam	Benzodiazepine receptor agonist
7846	-28.25	cp	BRD-K74430258	1,2-dichlorobenzene	Hepatotoxicant
7845	-28.22	cp	BRD-K67013324	luzindole	Melatonin receptor antagonist
7841	-28.05	cp	BRD-K19416115	sitagliptin	Dipeptidyl peptidase inhibitor
7838	-27.83	cp	BRD-A96897502	U-74389F	Lipid peroxidase inhibitor
7836	-27.69	cp	BRD-A33084410	5'-guanidinonaltrindole	Opioid receptor antagonist
7828	-27.51	cp	BRD-A13084692	troglitazone	Insulin sensitizer
7827	-27.48	cp	BRD-K80778372	RO-19-4605	GABA benzodiazepine site receptor inverse agonist
7826	-27.43	cp	BRD-K93280214	gabazine	GABA receptor antagonist
7823	-27.36	cp	BRD-K21350491	phenamil	TRPV antagonist
7822	-27.22	cp	BRD-K05926469	lenalidomide	Antineoplastic
7817	-27.03	cp	BRD-K95763993	trapidil	PDGFR receptor inhibitor
7816	-26.99	cp	BRD-A02990301	lofexidine	Adrenergic receptor agonist
7815	-26.86	cp	BRD-K38449220	seneciphylline	Cytochrome P450 inhibitor
7811	-26.66	cp	BRD-A63546914	RO-04-5595	Glutamate receptor antagonist
7809	-26.53	cp	BRD-A37492983	iocetamic-acid	Radiopaque medium
7808	-26.48	cp	BRD-K40175214	torin-1	MTOR inhibitor
7806	-26.43	cp	BRD-K71860425	CDK2-5-inhibitor	CDK inhibitor
7801	-26.11	cp	BRD-K85242180	beta-CCP	Indoleamine 2,3-dioxygenase inhibitor
7798	-25.91	cp	BRD-K14550461	doxercalciferol	Vitamin D receptor agonist
7797	-25.86	cp	BRD-K63195589	tipifarnib	Farnesyltransferase inhibitor
7794	-25.73	cp	BRD-A14966924	alaproclate	Serotonin receptor antagonist
7787	-25.48	cp	BRD-K96263742	GW-7647	PPAR receptor agonist
7784	-25.32	cp	BRD-K54094468	remoxipride	Dopamine receptor antagonist
7781	-25.26	cp	BRD-A63998256	helveticoside	ATPase inhibitor
7778	-25.02	cp	BRD-K00337317	NU-7441	DNA dependent protein kinase inhibitor
7775	-24.96	cp	BRD-K18523449	mestanolone	Androgenic steroid
7770	-24.8	cp	BRD-K96084870	DMBI	PDGFR receptor inhibitor
7768	-24.79	cp	BRD-K95785537	PP-2	SRC inhibitor
7769	-24.79	cp	BRD-A96456596	FPL-55712	Leukotriene receptor antagonist
7766	-24.73	cp	BRD-K06208435	YS-035	Calcium channel blocker
7765	-24.72	cp	BRD-A20239487	atenolol	Adrenergic receptor antagonist
7764	-24.69	cp	BRD-A06352508	SB-218078	CHK inhibitor
7763	-24.65	cp	BRD-K36864847	BD-1047	Adrenergic receptor antagonist
7761	-24.63	cp	BRD-K21450440	benzthiazide	Carbonic anhydrase inhibitor
7756	-24.27	cp	BRD-K79437791	acetyl-farnesyl-cysteine	Inhibitor of methylation of endogenous isoprenylated proteins
7755	-24.23	cp	BRD-A25234499	aminoglutethimide	Glucocorticoid receptor antagonist
7754	-24.2	cp	BRD-K18135438	chenodeoxycholic-acid	11-beta-HSD1 inhibitor
7752	-24.09	cp	BRD-K11158509	tyrphostin-B44	EGFR inhibitor
7749	-24.05	cp	BRD-K21806131	tegaserod	Serotonin receptor partial agonist
7747	-23.95	cp	BRD-K52662033	lidocaine	Histamine receptor agonist
7745	-23.88	cp	BRD-A44090213	indoprofen	Cyclooxygenase inhibitor
7744	-23.85	cp	BRD-K64402243	ivachtin	Caspase inhibitor
7741	-23.82	cp	BRD-K74501079	azithromycin	Bacterial 50S ribosomal subunit inhibitor
7738	-23.77	cp	BRD-K11742128	triprolidine	Histamine receptor antagonist
7734	-23.63	cp	BRD-U33728988	QL-X-138	MTOR inhibitor
7729	-23.42	cp	BRD-A97437073	rosiglitazone	Insulin sensitizer
7726	-23.28	cp	BRD-K05434375	HA-1004	Calcium channel blocker
7723	-23.21	cp	BRD-K15891719	tenofovir	Reverse transcriptase inhibitor
7724	-23.21	cp	BRD-K08640512	RS-100329	Adrenergic receptor antagonist
7725	-23.21	cp	BRD-K16554956	PTB1	AMPK activator
7720	-23.06	cp	BRD-K02637541	celecoxib	Cyclooxygenase inhibitor
7718	-23.02	cp	BRD-K64746805	MBCQ	Phosphodiesterase inhibitor
7715	-22.94	cp	BRD-K96119599	leucodin	Melanin inhibitor
7712	-22.75	cp	BRD-K93618743	ipriflavone	Bone resorption inhibitor
7711	-22.71	cp	BRD-K13642330	cosmosiin	Cytochrome P450 inhibitor
7708	-22.66	cp	BRD-A77118605	BML-ST330	Phospholipase inhibitor
7704	-22.56	cp	BRD-K31627533	rimexolone	Glucocorticoid receptor agonist
7705	-22.56	cp	BRD-A68039575	liquiritigenin	Aromatase inhibitor
7703	-22.52	cp	BRD-K43236057	piceid	ICAM1 inhibitor
7702	-22.46	cp	BRD-K02275692	cefotiam	Bacterial cell wall synthesis inhibitor
7701	-22.37	cp	BRD-K47328134	lysylphenylalanyl-tyrosine	Heparin activation inhibitor
7700	-22.32	cp	BRD-A04668240	CGP-52432	GABA receptor antagonist
7693	-22.07	cp	BRD-K00312224	PPT	Estrogen receptor agonist
7689	-21.86	cp	BRD-K48869804	icilin	TRPV agonist
7687	-21.84	cp	BRD-K02607075	tubocurarine	Acetylcholine receptor antagonist
7686	-21.82	cp	BRD-K62374253	rufloxacin	Bacterial DNA gyrase inhibitor
7684	-21.78	cp	BRD-K32292990	CGP-53353	EGFR inhibitor
7682	-21.63	cp	BRD-K11853856	PJ-34	PARP inhibitor
7681	-21.61	cp	BRD-K80396088	gliquidone	Sulfonylurea
7679	-21.52	cp	BRD-K45446451	JZL-184	Monoacylglucerol lipase inhibitor
7675	-21.41	cp	BRD-A62809825	thapsigargin	ATPase inhibitor
7676	-21.41	cp	BRD-K73391359	quinisocaine	Local anesthetic
7670	-21.29	cp	BRD-A03359064	ICI-89406	Adrenergic receptor antagonist
7668	-21.16	cp	BRD-K50388907	fenofibrate	PPAR receptor agonist
7664	-21.07	cp	BRD-K05906022	limonin	HIV protease inhibitor
7662	-21	cp	BRD-K25310650	ormetoprim	Bacterial antifolate
7648	-20.44	cp	BRD-K19111024	clofibric-acid	PPAR receptor agonist
7646	-20.33	cp	BRD-A82238138	budesonide	Glucocorticoid receptor agonist
7637	-20.22	cp	BRD-K85383046	IAA-94	Chloride channel blocker
7635	-20.18	cp	BRD-K56957086	dacinostat	HDAC inhibitor
7632	-20.03	cp	BRD-K96862998	pirfenidone	TGF beta receptor inhibitor
7627	-19.9	cp	BRD-K69932463	AZD-8055	MTOR inhibitor
7625	-19.8	cp	BRD-K92446736	zatebradine	HCN channel blocker
7618	-19.41	cp	BRD-K04976539	aminogenistein	SRC inhibitor
7615	-19.33	cp	BRD-A54927599	KF-38789	P-selectin inhibitor
7612	-19.18	cp	BRD-K41445866	alfaxalone	Chloride channel agonist
7609	-19.15	cp	BRD-K47693913	evoxine	Furoquinoline alkaloid
7608	-19.1	cp	BRD-K64935403	ebelactone-b	Lipase inhibitor
7606	-19.06	cp	BRD-U94846492	quinine	Hemozoin biocrystallization inhibitor
7605	-19.02	cp	BRD-K22947005	dexbrompheniramine	Histamine receptor antagonist
7599	-18.8	cp	BRD-K57631554	aminolevulinic-acid	Oxidizing agent
7598	-18.78	cp	BRD-A22707317	SB-205384	GABA receptor modulator
7597	-18.75	cp	BRD-K45252063	clofibrate	PPAR receptor agonist
7596	-18.73	cp	BRD-A29731977	17-hydroxyprogesterone-caproate	progesterone receptor agonist
7590	-18.45	cp	BRD-K51476772	ST-638	Tyrosine kinase inhibitor
7591	-18.45	cp	BRD-K56558538	ambroxol	Sodium channel blocker
7586	-18.4	cp	BRD-K92984783	melperone	Serotonin receptor antagonist
7585	-18.33	cp	BRD-A93424738	dexamethasone	Glucocorticoid receptor agonist
7581	-18.16	cp	BRD-K65910366	KUC103904N	-666
7582	-18.16	cp	BRD-K34995470	SU-1498	VEGFR inhibitor
7580	-18.15	cp	BRD-K48300629	zonisamide	Sodium channel blocker
7577	-18	cp	BRD-K94689771	pinocembrin	CYP1B1 inhibitor
7576	-17.98	cp	BRD-K31633810	DAU-5884	Acetylcholine receptor antagonist
7573	-17.88	cp	BRD-K35377380	I-OMe-AG-538	IGF-1 inhibitor
7571	-17.82	cp	BRD-A29289453	PCA-4248	Platelet activating factor receptor antagonist
7567	-17.69	cp	BRD-K85985071	ellipticine	Topoisomerase inhibitor
7565	-17.61	cp	BRD-K88849294	lobaric-acid	Tyrosine phosphatase inhibitor
7560	-17.54	cp	BRD-K66019333	oxantel	Anthelmintic
7558	-17.41	cp	BRD-A67981824	cefotaxime	Bacterial cell wall synthesis inhibitor
7557	-17.4	cp	BRD-K23204545	busulfan	DNA inhibitor
7551	-17.2	cp	BRD-K09859624	methantheline	Acetylcholine receptor antagonist
7546	-16.93	cp	BRD-K34415467	trimethobenzamide	Histamine receptor antagonist
7545	-16.87	cp	BRD-K95655893	MAZ-51	VEGFR inhibitor
7544	-16.86	cp	BRD-A95696820	acadesine	AMPK activator
7539	-16.68	cp	BRD-K46384212	o-3M3FBS	phospholipase activator
7536	-16.64	cp	BRD-K10098805	rhapontin	Apoptosis stimulant
7537	-16.64	cp	BRD-A35912562	pregnenolone	Glutamate receptor modulator
7531	-16.5	cp	BRD-K07507905	BRL-37344	Adrenergic receptor agonist
7522	-16.35	cp	BRD-K26117720	gingerol	Nitric oxide synthase inhibitor
7519	-16.26	cp	BRD-K01638814	rilmenidine	Adrenergic receptor agonist
7516	-16.21	cp	BRD-K14618467	IKK-16	IKK inhibitor
7511	-16.17	cp	BRD-K87048468	RS-102221	Serotonin receptor antagonist
7510	-16.11	cp	BRD-A80383043	BRD-A80383043	Glutamate receptor agonist
7509	-16.1	cp	BRD-K09436313	prostaglandin	Prostanoid receptor antagonist
7506	-16.04	cp	BRD-A53131506	epitestosterone	Inactive testosterone analog
7503	-15.99	cp	BRD-K41903098	diphenoxylate	Opioid receptor agonist
7500	-15.94	cp	BRD-K69837166	trap-101	Nociceptin/orphanin FQ (NOP) receptor antagonist
7501	-15.94	cp	BRD-K76810206	nicergoline	Adrenergic receptor antagonist
7502	-15.94	cp	BRD-K35723520	darinaparsin	Apoptosis stimulant
7498	-15.93	cp	BRD-K65786282	CGP-7930	GABA receptor modulator
7497	-15.83	cp	BRD-K82577285	dipropyl-dopamine	Dopamine receptor agonist
7496	-15.82	cp	BRD-K10177585	PSB-11	Adenosine receptor antagonist
7494	-15.75	cp	BRD-K09537769	NU-7026	DNA dependent protein kinase inhibitor
7493	-15.72	cp	BRD-K70577657	H-9	PKA inhibitor
7491	-15.65	cp	BRD-K45988865	tetramethylsilane	Internal standard for NMR spectroscopy
7489	-15.61	cp	BRD-K63979671	etifenin	Compound used in hepatobiliary scans of the liver
7488	-15.57	cp	BRD-K62206109	VUF-5681	Histamine receptor antagonist
7487	-15.55	cp	BRD-K21565985	xylazine	Adrenergic receptor agonist
7486	-15.52	cp	BRD-A02176148	tubaic-acid	Mitochondrial complex I inhibitor
7485	-15.46	cp	BRD-K60923938	veratridine	Sodium channel activator
7484	-15.41	cp	BRD-K78692225	leflunomide	Dihydroorotate dehydrogenase inhibitor
7483	-15.38	cp	BRD-A55594068	vinblastine	Microtubule inhibitor
7482	-15.35	cp	BRD-K70281171	U-99194	Dopamine receptor antagonist
7479	-15.25	cp	BRD-K47539947	tetradecylthioacetic-acid	Lipid peroxidase inhibitor
7476	-15.2	cp	BRD-K56047318	RHC-80267	Triacylglycerol lipase inhibitor
7475	-15.14	cp	BRD-K15196155	IBC-293	Hydroxycarboxylic acid receptor agonist
7471	-15.09	cp	BRD-A98431941	ephedrine	Adrenergic receptor agonist
7469	-15.04	cp	BRD-K57718010	pentylenetetrazol	GABA receptor antagonist
7465	-14.89	cp	BRD-K36740062	GSK-1070916	Aurora kinase inhibitor
7460	-14.77	cp	BRD-K90382497	GW-843682X	PLK inhibitor
7454	-14.54	cp	BRD-K27305650	LY-294002	MTOR inhibitor
7451	-14.51	cp	BRD-K56115039	BU-226	Imidazoline receptor ligand
7446	-14.31	cp	BRD-K79684402	RO-10-5824	Dopamine receptor agonist
7443	-14.24	cp	BRD-K12184916	dactolisib	MTOR inhibitor
7439	-14.17	cp	BRD-K97056771	HY-11007	BCR-ABL kinase inhibitor
7433	-14.1	cp	BRD-K33459542	ditolylguanidine	Sigma receptor agonist
7430	-14.06	cp	BRD-A43882281	pinacidil	ATP channel activator
7418	-13.65	cp	BRD-K82164249	andarine	Androgen receptor modulator
7416	-13.6	cp	BRD-K66412701	pazufloxacin	Topoisomerase inhibitor
7414	-13.59	cp	BRD-K79090631	CGP-60474	CDK inhibitor
7415	-13.59	cp	BRD-A31800922	procyclidine	Acetylcholine receptor antagonist
7407	-13.45	cp	BRD-K28667196	fillalbin	Increases arterial blood pressure
7405	-13.41	cp	BRD-K30570479	VU-0400195-3	Glutamate receptor modulator
7397	-13.22	cp	BRD-K73319509	PF-04217903	c-Met inhibitor
7396	-13.16	cp	BRD-K94294671	OSI-027	MTOR inhibitor
7395	-13.15	cp	BRD-A39747742	estradiol-valerate	Estrogen receptor agonist
7392	-13.07	cp	BRD-K85030058	benactyzine	Acetylcholine receptor antagonist
7391	-12.99	cp	BRD-A24122750	saclofen	GABA receptor antagonist
7389	-12.94	cp	BRD-K40965114	cyanopindolol	Adrenergic receptor antagonist
7388	-12.93	cp	BRD-K01779529	fluoropyruvate	Pyruvate dehydrogenase kinase inhibitor
7383	-12.82	cp	BRD-A62434282	goserelin	Gonadotropin releasing factor hormone receptor agonist
7382	-12.81	cp	BRD-A31521121	methocarbamol	Muscle relaxant
7381	-12.78	cp	BRD-K77998258	ganglioside	SRC activator
7380	-12.77	cp	BRD-K01612348	meropenem	Bacterial cell wall synthesis inhibitor
7378	-12.76	cp	BRD-A40639672	ketorolac	Cyclooxygenase inhibitor
7376	-12.74	cp	BRD-A74980173	gatifloxacin	Bacterial DNA gyrase inhibitor
7373	-12.66	cp	BRD-K64606589	apicidin	HDAC inhibitor
7372	-12.64	cp	BRD-K59419204	AM-281	Cannabinoid receptor antagonist
7369	-12.57	cp	BRD-K70914287	BIBX-1382	EGFR inhibitor
7367	-12.55	cp	BRD-K42679050	Y-27152	Potassium channel activator
7365	-12.51	cp	BRD-K53123955	niridazole	Phosphofructokinase inhibitor
7363	-12.49	cp	BRD-K48029790	OBAA	Phospholipase inhibitor
7362	-12.47	cp	BRD-K14888893	minoxidil	KATP activator
7359	-12.45	cp	BRD-A52172093	VU-0413807-2	Calcium channel blocker
7357	-12.41	cp	BRD-A85234536	N6-cyclopentyladenosine	Adenosine receptor agonist
7355	-12.4	cp	BRD-K70401845	erlotinib	EGFR inhibitor
7352	-12.35	cp	BRD-A68929948	DAPT-GSI-IX	Gamma secretase inhibitor
7351	-12.34	cp	BRD-K74763371	bosentan	Endothelin receptor antagonist
7348	-12.2	cp	BRD-K21971034	OM-137	Aurora kinase inhibitor
7346	-12.17	cp	BRD-K16478699	PLX-4720	RAF inhibitor
7342	-12.16	cp	BRD-K68246049	TTNPB	Retinoid receptor agonist
7341	-12.15	cp	BRD-K87990216	piretanide	Glucocorticoid receptor agonist
7339	-12.1	cp	BRD-K52459643	prostaglandin-e1	Prostanoid receptor agonist
7337	-12.05	cp	BRD-K05901394	terguride	Dopamine receptor agonist
7335	-12	cp	BRD-A44448661	pentobarbital	Barbiturate antiepileptic
7333	-11.99	cp	BRD-K41051431	mecillinam	Bacterial cell wall synthesis inhibitor
7329	-11.87	cp	BRD-K61097567	SB-218795	Tachykinin antagonist
7328	-11.84	cp	BRD-A19736161	ondansetron	Serotonin receptor antagonist
7320	-11.55	cp	BRD-K61951118	FG-7142	GABA benzodiazepine site receptor inverse agonist
7317	-11.53	cp	BRD-K16277217	piperacetazine	Dopamine receptor antagonist
7318	-11.53	cp	BRD-A07824748	flavanone	11-beta-HSD1 inhibitor
7316	-11.47	cp	BRD-K68341547	W-9	Calmodulin antagonist
7313	-11.42	cp	BRD-K83636919	entacapone	Catechol O methyltransferase inhibitor
7312	-11.41	cp	BRD-K68332390	ponalrestat	Aldose reductase inhibitor
7307	-11.34	cp	BRD-A92630576	trimebutine	Opioid receptor agonist
7306	-11.33	cp	BRD-K25906698	immepip	Histamine receptor agonist
7305	-11.31	cp	BRD-A78322124	dobutamine	Adrenergic receptor agonist
7300	-11.24	cp	BRD-K69650333	idarubicin	Topoisomerase inhibitor
7297	-11.22	cp	BRD-A17448384	beclometasone	Glucocorticoid receptor agonist
7293	-11.16	cp	BRD-A72596465	GW-6471	PPAR receptor antagonist
7294	-11.16	cp	BRD-K64755930	etazolate	Phosphodiesterase inhibitor
7290	-11.11	cp	BRD-K69600043	thiethylperazine	Dopamine receptor antagonist
7287	-11.07	cp	BRD-A63667919	methylergometrine	Dopamine receptor antagonist
7286	-11.06	cp	BRD-K01436366	XMD-1150	Leucine rich repeat kinase inhibitor
7284	-11	cp	BRD-K48935217	epothilone	Microtubule inhibitor
7282	-10.99	cp	BRD-K30743633	TCPOBOP	CAR agonist
7281	-10.96	cp	BRD-K81062487	taurocholic-acid	Bile acid
7278	-10.91	cp	BRD-K38305202	domperidone	Dopamine receptor antagonist
7277	-10.88	cp	BRD-K93645900	tadalafil	Phosphodiesterase inhibitor
7275	-10.85	cp	BRD-K15086322	JNJ-10191584	Histamine receptor antagonist
7274	-10.84	cp	BRD-K59851896	calycanthine	GABA release inhibitor
7272	-10.82	cp	BRD-A74500471	ethambutol	Bacterial cell wall synthesis inhibitor
7273	-10.82	cp	BRD-K34820100	tebuthiuron	Photosynthesis inhibitor
7269	-10.8	cp	BRD-K61192372	capecitabine	DNA synthesis inhibitor
7270	-10.8	cp	BRD-K34154330	tracazolate	GABA receptor modulator
7265	-10.73	cp	BRD-K93176058	AC-55649	Retinoid receptor agonist
7261	-10.65	cp	BRD-K53570330	carbofuran	Cholinesterase inhibitor
7259	-10.63	cp	BRD-K37792168	denbufylline	Phosphodiesterase inhibitor
7260	-10.63	cp	BRD-K80527266	triacsin-c	Adrenergic receptor antagonist
7258	-10.62	cp	BRD-K18194590	mephentermine	Adrenergic receptor agonist
7250	-10.44	cp	BRD-K09499853	KU-0060648	DNA dependent protein kinase inhibitor
7246	-10.41	cp	BRD-A11605036	thiocolchicoside	GABA receptor antagonist
7244	-10.37	cp	BRD-K93325701	damnacanthal	SRC inhibitor
7241	-10.33	cp	BRD-A55393291	testosterone	Androgen receptor agonist
7239	-10.32	cp	BRD-K34441861	moexipril	ACE inhibitor
7236	-10.23	cp	BRD-K65146499	nabumetone	Cyclooxygenase inhibitor
7224	-9.87	cp	BRD-A92161634	scopoline	Acetylcholine receptor antagonist
7223	-9.85	cp	BRD-K36965586	m-chlorophenylbiguanide	Serotonin receptor agonist
7221	-9.82	cp	BRD-K22503835	scriptaid	HDAC inhibitor
7220	-9.8	cp	BRD-K49519092	immethridine	Histamine receptor agonist
7216	-9.68	cp	BRD-K01624546	docosatrienoic-acid	LTB4 inhibitor
7210	-9.6	cp	BRD-K40578143	GR-79236	Adenosine receptor agonist
7207	-9.58	cp	BRD-K86873305	piperacillin	Bacterial cell wall synthesis inhibitor
7203	-9.53	cp	BRD-A34255068	rolipram	Phosphodiesterase inhibitor
7202	-9.49	cp	BRD-K02581333	protein-tyrosine-phosphatase-inhibitor-IV	Tyrosine phosphatase inhibitor
7198	-9.45	cp	BRD-K92726801	hydrastinine	Haemostatic agent
7196	-9.43	cp	BRD-A41304429	practolol	Adrenergic receptor antagonist
7192	-9.4	cp	BRD-K26521938	dinoprostone	Prostanoid receptor agonist
7193	-9.4	cp	BRD-K03842655	penitrem-a	Potassium channel blocker
7190	-9.36	cp	BRD-A72758037	asiatic-acid	Apoptosis stimulant
7188	-9.28	cp	BRD-A24228527	ofloxacin	Bacterial DNA gyrase inhibitor
7184	-9.19	cp	BRD-K65814004	diphenyleneiodonium	Nitric oxide synthase inhibitor
7176	-9.11	cp	BRD-K57926513	tyrphostin-AG-1295	PDGFR receptor inhibitor
7177	-9.11	cp	BRD-K52735702	cefdinir	Bacterial cell wall synthesis inhibitor
7175	-9.1	cp	BRD-K32645441	dipropyl-5ct	Serotonin receptor agonist
7173	-9.08	cp	BRD-K46435977	valaciclovir	DNA polymerase inhibitor
7165	-8.93	cp	BRD-K30697463	desoximetasone	Glucocorticoid receptor agonist
7162	-8.81	cp	BRD-K75532464	FTI-276	Farnesyltransferase inhibitor
7161	-8.8	cp	BRD-K82865713	prostaglandin-b2	cAMP inhibitor
7157	-8.71	cp	BRD-A43974575	tranylcypromine	Monoamine oxidase inhibitor
7155	-8.67	cp	BRD-K17823458	danoprevir	HCV inhibitor
7149	-8.53	cp	BRD-K49372556	mofezolac	Cyclooxygenase inhibitor
7147	-8.52	cp	BRD-A59215453	lobelanidine	Acetylcholine receptor antagonist
7148	-8.52	cp	BRD-K82846253	repaglinide	Insulin secretagogue
7146	-8.51	cp	BRD-K54704028	BAY-36-7620	Glutamate receptor antagonist
7143	-8.49	cp	BRD-A42346008	metanephrine	Epinephrine metabolite
7137	-8.35	cp	BRD-A55416093	colforsin	Adenylyl cyclase activator
7136	-8.34	cp	BRD-K70881766	solanine	Acetylcholinesterase inhibitor
7135	-8.33	cp	BRD-K11905747	spectinomycin	Bacterial 30S ribosomal subunit inhibitor
7133	-8.25	cp	BRD-K68620903	dydrogesterone	Progesterone receptor agonist
7130	-8.23	cp	BRD-A39290993	cyproterone	Androgen receptor antagonist
7131	-8.23	cp	BRD-A25067867	benzatropine	Acetylcholine receptor antagonist
7122	-8.09	cp	BRD-K46742498	alosetron	Serotonin receptor antagonist
7121	-8.05	cp	BRD-K62363391	dapsone	Bacterial antifolate
7120	-8.04	cp	BRD-K85603128	resorcinol	Phosphodiesterase inhibitor
7117	-8.03	cp	BRD-A32349859	methyl-angolensate	Apoptosis inhibitor
7113	-8.01	cp	BRD-M30523314	vinorelbine	Tubulin inhibitor
7114	-8.01	cp	BRD-K95899059	LY-344864	Serotonin receptor agonist
7115	-8.01	cp	BRD-A29734509	disopyramide	Sodium channel blocker
7111	-8	cp	BRD-A36217750	sulfinpyrazone	Uricosuric blocker
7105	-7.92	cp	BRD-K93188295	ARC-239	Adrenergic receptor antagonist
7104	-7.9	cp	BRD-K76723084	isotretinoin	Retinoid receptor agonist
7103	-7.86	cp	BRD-A55369275	CGP-54626	GABA receptor antagonist
7099	-7.8	cp	BRD-A02180903	betamethasone	Glucocorticoid receptor agonist
7098	-7.79	cp	BRD-K37720887	SB-525334	TGF beta receptor inhibitor
7095	-7.73	cp	BRD-A03623303	metoprolol	Adrenergic receptor antagonist
7091	-7.68	cp	BRD-K15519488	CS-110266	Dopamine receptor agonist
7083	-7.54	cp	BRD-K15601958	SEW-2871	Lysophospholipid receptor agonist
7084	-7.54	cp	BRD-K09631521	thiotepa	Cytochrome P450 inhibitor
7065	-7.33	cp	BRD-A07395371	esmolol	Adrenergic receptor antagonist
7062	-7.32	cp	BRD-K36377456	marmesin	Angiogenesis inhibitor
7064	-7.32	cp	BRD-K02867583	minaprine	Serotonin reuptake inhibitor
7053	-7.22	cp	BRD-K85402309	dovitinib	EGFR inhibitor
7054	-7.22	cp	BRD-K39462424	dexchlorpheniramine	Histamine receptor antagonist
7046	-7.19	cp	BRD-K51018020	VAMA-37	DNA dependent protein kinase inhibitor
7049	-7.19	cp	BRD-A93255169	thalidomide	TNF production inhibitor
7044	-7.15	cp	BRD-K32836707	CAY-10577	Casein kinase inhibitor
7042	-7.14	cp	BRD-K50891186	GR-103691	Dopamine receptor antagonist
7039	-7.12	cp	BRD-K08109516	L-701324	Glutamate receptor antagonist
7040	-7.12	cp	BRD-K77987382	mebendazole	Tubulin inhibitor
7035	-7.08	cp	BRD-K91733562	secoisolariciresinol	Antioxidant
7036	-7.08	cp	BRD-K40887525	ritanserin	Serotonin receptor antagonist
7037	-7.08	cp	BRD-K55424922	anpirtoline	Serotonin receptor agonist
7034	-7.05	cp	BRD-K17743125	belinostat	HDAC inhibitor
7032	-7.03	cp	BRD-A01593789	chlormadinone	5-alpha reductase inhibitor
7033	-7.03	cp	BRD-A13188892	doxazosin	Adrenergic receptor antagonist
7029	-6.98	cp	BRD-K83144676	olmesartan	Angiotensin antagonist
7026	-6.96	cp	BRD-K08806317	timolol	Adrenergic receptor antagonist
7022	-6.91	cp	BRD-K06750613	GSK-1059615	PI3K inhibitor
7021	-6.89	cp	BRD-K70358946	aripiprazole	Serotonin receptor agonist
7017	-6.79	cp	BRD-A09925278	etilefrine	Adrenergic receptor agonist
7012	-6.77	cp	BRD-A04352665	maraviroc	CC chemokine receptor antagonist
7013	-6.77	cp	BRD-K15164005	apoptosis-activator-II	Carboxylesterase inhibitor
7015	-6.77	cp	BRD-K67566344	KU-0063794	MTOR inhibitor
7002	-6.62	cp	BRD-K60274257	dephostatin	Tyrosine phosphatase inhibitor
6999	-6.57	cp	BRD-K77641333	naphazoline	Adrenergic receptor agonist
6997	-6.56	cp	BRD-K23369905	oxiconazole	Bacterial cell wall synthesis inhibitor
6998	-6.56	cp	BRD-K63068307	ZSTK-474	PI3K inhibitor
6991	-6.5	cp	BRD-K14696368	9-methyl-5H-6-thia-4,5-diaza-chrysene-6,6-dioxide	NFkB pathway inhibitor
6988	-6.49	cp	BRD-K08619574	thioproperazine	Dopamine receptor antagonist
6987	-6.48	cp	BRD-K07888196	tyrphostin-AG-538	IGF-1 inhibitor
6982	-6.43	cp	BRD-K18059238	gamma-linolenic-acid	Cyclooxygenase inhibitor
6979	-6.39	cp	BRD-K16664969	GTP-14564	FLT3 inhibitor
6977	-6.38	cp	BRD-K10852020	tolcapone	Catechol O methyltransferase inhibitor
6974	-6.36	cp	BRD-K96809896	SKF-86002	p38 MAPK inhibitor
6970	-6.34	cp	BRD-K62012036	acitretin	Retinoid receptor agonist
6969	-6.33	cp	BRD-K52989797	clomipramine	Serotonin transporter inhibitor (SERT)
6968	-6.32	cp	BRD-A25143711	hydrocortisone	Glucocorticoid receptor agonist
6967	-6.31	cp	BRD-K63430059	methoxsalen	DNA synthesis inhibitor
6963	-6.22	cp	BRD-A87719232	naproxen	Cyclooxygenase inhibitor
6956	-6.13	cp	BRD-K67680372	CI-966	GAT inhibitor
6945	-6.03	cp	BRD-K74765201	tomelukast	Leukotriene receptor antagonist
6942	-5.98	cp	BRD-K79116891	proxymetacaine	Sodium channel blocker
6940	-5.97	cp	BRD-K30189597	SYK-inhibitor	SYK inhibitor
6936	-5.95	cp	BRD-K06467078	corynanthine	Adrenergic receptor antagonist
6932	-5.93	cp	BRD-K50135270	GBR-12935	Dopamine uptake inhibitor
6933	-5.93	cp	BRD-K98769987	flumazenil	Benzodiazepine receptor antagonist
6930	-5.92	cp	BRD-K37456065	VU-0365114-2	M5 modulator
6926	-5.91	cp	BRD-K05181084	NGB-2904	Dopamine receptor antagonist
6927	-5.91	cp	BRD-A67862938	naftidrofuryl	Adrenergic receptor antagonist
6918	-5.86	cp	BRD-K66876909	linezolid	Bacterial 50S ribosomal subunit inhibitor
6913	-5.82	cp	BRD-K64890080	BI-2536	PLK inhibitor
6910	-5.81	cp	BRD-A25004090	erastin	Ion channel antagonist
6911	-5.81	cp	BRD-A61392169	eliprodil	Glutamate receptor antagonist
6905	-5.78	cp	BRD-A96107863	nisoldipine	Calcium channel blocker
6906	-5.78	cp	BRD-K12516989	zaprinast	Phosphodiesterase inhibitor
6903	-5.74	cp	BRD-A78377521	monastrol	Kinesin-like spindle protein inhibitor
6892	-5.66	cp	BRD-A19661776	mianserin	Serotonin receptor antagonist
6887	-5.62	cp	BRD-K09497549	kawain	Calcium channel modulator
6884	-5.6	cp	BRD-A20589515	dihydroxyphenylglycine	Glutamate receptor agonist
6882	-5.58	cp	BRD-A10070317	propranolol	Adrenergic receptor antagonist
6880	-5.55	cp	BRD-K84639753	safinamide	Dopamine uptake inhibitor
6879	-5.49	cp	BRD-K41143549	BRD-K41143549	Glutamate receptor antagonist
6875	-5.43	cp	BRD-K68191783	ALW-II-38-3	Ephrin inhibitor
6865	-5.36	cp	BRD-A39172021	ampiroxicam	Cyclooxygenase inhibitor
6866	-5.36	cp	BRD-K24201553	SB-269970	Serotonin receptor antagonist
6869	-5.36	cp	BRD-A64092382	mexiletine	Sodium channel blocker
6862	-5.34	cp	BRD-K28849549	mesalazine	Cyclooxygenase inhibitor
6860	-5.33	cp	BRD-K60690191	MPEP	Glutamate receptor antagonist
6855	-5.26	cp	BRD-A96882008	L-732138	Tachykinin antagonist
6853	-5.25	cp	BRD-K59597909	phenothiazine	Dopamine receptor antagonist
6846	-5.21	cp	BRD-K46678324	RHO-kinase-inhibitor-II	Rho associated kinase inhibitor
6851	-5.21	cp	BRD-K94353609	fluocinolone	Glucocorticoid receptor agonist
6840	-5.18	cp	BRD-A47144777	dihydro-7-desacetyldeoxygedunin	HSP inhibitor
6838	-5.16	cp	BRD-A66199457	asiaticoside	Antineoplastic
6836	-5.14	cp	BRD-A37052580	physostigmine	Acetylcholinesterase inhibitor
6837	-5.14	cp	BRD-K88611939	aniracetam	Glutamate receptor agonist
6830	-5.11	cp	BRD-K67506692	tyrphostin-AG-126	ERK1 and ERK2 phosphorylation inhibitor
6831	-5.11	cp	BRD-K60640630	mometasone	Glucocorticoid receptor agonist
6828	-5.09	cp	BRD-K77793136	hydroxyfasudil	Rho associated kinase inhibitor
6827	-5.08	cp	BRD-K37848908	ceforanide	Penicillin binding protein inhibitor
6825	-5.07	cp	BRD-K11107424	tiotidine	Histamine receptor antagonist
6826	-5.07	cp	BRD-K11163873	phenanthridone	PARP inhibitor
6822	-5.05	cp	BRD-K49456190	prima-1-met	thioredoxin inhibitor
6824	-5.05	cp	BRD-A47513740	calyculin	Protein phosphatase inhibitor
6820	-5.04	cp	BRD-K48932581	cetraxate	Mucus protecting agent
6812	-4.95	cp	BRD-K42221274	NNC-711	GAT inhibitor
6811	-4.93	cp	BRD-K33204703	AG-370	PDGFR receptor inhibitor
6803	-4.83	cp	BRD-K73293050	WZ-3146	EGFR inhibitor
6802	-4.82	cp	BRD-K81783531	VX-222	HCV inhibitor
6800	-4.81	cp	BRD-K86930074	cediranib	KIT inhibitor
6797	-4.79	cp	BRD-K68174511	torin-2	MTOR inhibitor
6798	-4.79	cp	BRD-K48692744	NU-1025	PARP inhibitor
6795	-4.78	cp	BRD-K32107296	temozolomide	DNA alkylating agent
6792	-4.76	cp	BRD-A42423104	benproperine	Antitussive
6777	-4.65	cp	BRD-K86600316	RS-79948	Adrenergic receptor antagonist
6776	-4.64	cp	BRD-A78391468	prednisolone	Glucocorticoid receptor agonist
6774	-4.63	cp	BRD-K94649603	taxifolin	Opioid receptor antagonist
6772	-4.62	cp	BRD-A67748489	K3644	Kinesin-like spindle protein inhibitor
6763	-4.51	cp	BRD-K60511616	pravastatin	HMGCR inhibitor
6764	-4.51	cp	BRD-K18816859	L-694247	Serotonin receptor agonist
6752	-4.41	cp	BRD-K77695569	tiabendazole	Angiogenesis inhibitor
6750	-4.4	cp	BRD-K14643723	4-(2-Amino-ethyl)-benzenesulfonamide	carbonic anhydrase inhibitor
6751	-4.4	cp	BRD-K82688027	RG-13022	PDGFR receptor inhibitor
6745	-4.35	cp	BRD-K49945136	GR-113808	Serotonin receptor antagonist
6741	-4.33	cp	BRD-K41170226	deoxycholic-acid	G protein-coupled receptor agonist
6742	-4.33	cp	BRD-A32836748	leu-enkephalin	Opioid receptor agonist
6737	-4.26	cp	BRD-K49404994	levetiracetam	Calcium channel blocker
6726	-4.22	cp	BRD-K61480498	epoxycholesterol	LXR agonist
6727	-4.22	cp	BRD-K05658747	raltegravir	HIV integrase inhibitor
6721	-4.2	cp	BRD-K32164935	tolazamide	ATP channel blocker
6718	-4.19	cp	BRD-A44133049	azasetron	Serotonin receptor antagonist
6719	-4.19	cp	BRD-A48809242	IB-MECA	Adenosine receptor agonist
6720	-4.19	cp	BRD-A24514565	warfarin	Vitamin K antagonist
6715	-4.16	cp	BRD-K94919853	10H-phenothiazin-10-yl)(p-tolyl)methanone	Butyrylcholinesterase inhibitor
6716	-4.16	cp	BRD-A54487287	cortisone	Glucocorticoid receptor agonist
6710	-4.12	cp	BRD-A15034104	bergenin	Interleukin inhibitor
6708	-4.09	cp	BRD-K55677650	CO-101244	Ionotropic glutamate receptor antagonist
6709	-4.09	cp	BRD-K15502390	nevirapine	Reverse transcriptase inhibitor
6706	-4.08	cp	BRD-K55468218	spiperone	Dopamine receptor antagonist
6699	-4.02	cp	BRD-K83302049	protopine	Histamine receptor antagonist
6697	-4	cp	BRD-K03981224	ethisterone	Progestogen hormone
6693	-3.98	cp	BRD-K70301876	escitalopram	Selective serotonin reuptake inhibitor (SSRI)
6696	-3.98	cp	BRD-K66615216	moxifloxacin	Bacterial DNA gyrase inhibitor
6685	-3.95	cp	BRD-A01643550	prednisolone	Glucocorticoid receptor agonist
6683	-3.93	cp	BRD-A39390670	rabeprazole	ATPase inhibitor
6679	-3.9	cp	BRD-K84085265	CG-930	JNK inhibitor
6677	-3.88	cp	BRD-K06712146	YM-90709	IL5 inhibitor
6675	-3.87	cp	BRD-K39944607	ochratoxin-a	Phenylalanyl tRNA synthetase inhibitor
6673	-3.85	cp	BRD-A50928468	norgestrel	Progesterone receptor agonist
6674	-3.85	cp	BRD-K43736954	cortisone	Glucocorticoid receptor agonist
6662	-3.79	cp	BRD-K63265447	docetaxel	Tubulin inhibitor
6659	-3.77	cp	BRD-A38913120	BH3I-1	BCL inhibitor
6652	-3.74	cp	BRD-K44876623	zolpidem	Benzodiazepine receptor agonist
6650	-3.7	cp	BRD-K93460210	lamotrigine	Serotonin receptor antagonist
6651	-3.7	cp	BRD-K92758126	gibberellic-acid	NFkB pathway inhibitor
6648	-3.69	cp	BRD-A43671941	oxprenolol	Adrenergic receptor antagonist
6647	-3.68	cp	BRD-K90976994	dehydrocholic-acid	Bile acid
6645	-3.67	cp	BRD-A39268308	epibatidine	Acetylcholine receptor agonist
6644	-3.66	cp	BRD-K71512533	SNS-314	Aurora kinase inhibitor
6638	-3.64	cp	BRD-K49027941	PSB-1115	Adenosine receptor antagonist
6635	-3.63	cp	BRD-A98702003	carbenoxolone	11-beta-HSD1 inhibitor
6630	-3.57	cp	BRD-A54845972	dihydroergotamine	Serotonin receptor agonist
6628	-3.56	cp	BRD-A04308630	genipin	Choleretic agent
6629	-3.56	cp	BRD-K55991774	BAS-09104376	HIV integrase inhibitor
6621	-3.52	cp	BRD-K91601245	mercaptopurine	Immunosuppressant
6609	-3.49	cp	BRD-K82091397	SB-239063	p38 MAPK inhibitor
6610	-3.49	cp	BRD-K96740444	itopride	Dopamine receptor antagonist
6611	-3.49	cp	BRD-A95696066	nisoxetine	Norepinephrine reuptake inhibitor
6612	-3.49	cp	BRD-K28168037	fenretinide	Apoptosis stimulant
6602	-3.46	cp	BRD-A41722204	sulmazole	Adenosine receptor antagonist
6597	-3.45	cp	BRD-K75699339	rizatriptan	Serotonin receptor agonist
6594	-3.42	cp	BRD-A03216249	mepivacaine	Potassium channel blocker
6592	-3.41	cp	BRD-A74667430	etodolac	Cyclooxygenase inhibitor
6587	-3.38	cp	BRD-K80672993	M2-PK-activator	-666
6588	-3.38	cp	BRD-K52911425	GDC-0941	PI3K inhibitor
6589	-3.38	cp	BRD-K15933101	ropinirole	Dopamine receptor agonist
6590	-3.38	cp	BRD-K06080977	eicosatetraynoic-acid	Cyclooxygenase inhibitor
6582	-3.35	cp	BRD-K39391626	ethylestrenol	Progesterone receptor agonist
6573	-3.31	cp	BRD-K37130656	rivaroxaban	Coagulation inhibitor
6574	-3.31	cp	BRD-K49890030	gavestinel	Glutamate receptor antagonist
6562	-3.28	cp	BRD-K88871508	lisuride	Dopamine receptor agonist
6563	-3.28	cp	BRD-K56509348	BMS-182874	Endothelin receptor antagonist
6564	-3.28	cp	BRD-A97739905	ketoprofen	Cyclooxygenase inhibitor
6557	-3.26	cp	BRD-K62792802	LY-83583	Guanylyl cyclase inhibitor
6547	-3.22	cp	BRD-K19360254	ergocornine	Dopamine receptor agonist
6548	-3.22	cp	BRD-A29426959	carbinoxamine	Histamine receptor antagonist
6543	-3.2	cp	BRD-K53414658	tivozanib	VEGFR inhibitor
6539	-3.17	cp	BRD-K10670311	sulfasalazine	Antirheumatic
6540	-3.17	cp	BRD-A49358627	ciprofibrate	PPAR receptor agonist
6541	-3.17	cp	BRD-K36258877	AZ-10417808	Caspase inhibitor
6536	-3.16	cp	BRD-K61341215	vecuronium	Acetylcholine receptor antagonist
6530	-3.14	cp	BRD-K99447003	enalaprilat	ACE inhibitor
6531	-3.14	cp	BRD-M00539986	formoterol	Adrenergic receptor agonist
6533	-3.14	cp	BRD-K93433262	alfacalcidol	Vitamin D receptor agonist
6527	-3.13	cp	BRD-K62929068	6-benzylaminopurine	Purinergic receptor activator
6521	-3.1	cp	BRD-A43849199	karakoline	Phytotoxin
6515	-3.08	cp	BRD-K39915878	loxapine	Dopamine receptor antagonist
6519	-3.08	cp	BRD-K81418486	vorinostat	HDAC inhibitor
6513	-3.07	cp	BRD-A70514680	articaine	Local anesthetic
6514	-3.07	cp	BRD-K27721098	clopidogrel	Purinergic receptor antagonist
6510	-3.04	cp	BRD-A04327189	synephrine	Adrenergic receptor agonist
6509	-3.03	cp	BRD-K35559145	levomepromazine	Dopamine receptor antagonist
6507	-3.02	cp	BRD-K71799949	carbamazepine	Carboxamide antiepileptic
6503	-3	cp	BRD-K61217870	n-(3-acetamidophenyl)-3-chlorobenzamide	Glutamate receptor antagonist
6502	-2.98	cp	BRD-A18620900	estriol	Estrogen receptor agonist
6498	-2.96	cp	BRD-K85925969	zalcitabine	Nucleoside reverse transcriptase inhibitor
6499	-2.96	cp	BRD-A71657825	2-(biphenyl-4-ylsulfonamido)pentanedioic-acid	Matrix metalloprotease inhibitor
6500	-2.96	cp	BRD-K76617868	fasudil	Rho associated kinase inhibitor
6494	-2.94	cp	BRD-K37289225	clozapine	Dopamine receptor antagonist
6489	-2.92	cp	BRD-K97799481	theophylline	Adenosine receptor antagonist
6492	-2.92	cp	BRD-K86434416	selegiline	Monoamine oxidase inhibitor
6485	-2.89	cp	BRD-K59469039	AG-879	Angiogenesis inhibitor
6486	-2.89	cp	BRD-K52522949	NCH-51	HDAC inhibitor
6487	-2.89	cp	BRD-K07881437	danusertib	Aurora kinase inhibitor
6481	-2.86	cp	BRD-K70511574	sunitinib	PLK inhibitor
6479	-2.85	cp	BRD-K40990712	hexamethyleneamiloride	Sodium/hydrogen antiport inhibitor
6480	-2.85	cp	BRD-A37776212	ICI-204448	Opioid receptor agonist
6478	-2.84	cp	BRD-K93880783	stavudine	DNA directed DNA polymerase inhibitor
6474	-2.82	cp	BRD-K47598052	PP-1	SRC inhibitor
6475	-2.82	cp	BRD-K06234293	LY-364947	TGF beta receptor inhibitor
6468	-2.78	cp	BRD-K43764301	dexketoprofen	Cyclooxygenase inhibitor
6470	-2.78	cp	BRD-K92723993	imatinib	BCR-ABL kinase inhibitor
6461	-2.75	cp	BRD-A56245458	reichstein	Androgen receptor antagonist
6462	-2.75	cp	BRD-A91699651	chloroquine	Antimalarial
6458	-2.74	cp	BRD-K13049116	BMS-754807	IGF-1 inhibitor
6449	-2.71	cp	BRD-K97564742	mepyramine	Histamine receptor antagonist
6451	-2.71	cp	BRD-K31283835	tofacitinib	JAK inhibitor
6441	-2.67	cp	BRD-K78278890	NM-PP1	Mutant kinase inhibitor
6437	-2.66	cp	BRD-K31699485	DMEOB	glutamate receptor modulator
6436	-2.65	cp	BRD-K59522102	piperine	Monoamine oxidase inhibitor
6433	-2.64	cp	BRD-A83892713	rifampicin	RNA polymerase inhibitor
6434	-2.64	cp	BRD-K52620403	STO-609	Calmodulin antagonist
6435	-2.64	cp	BRD-K09638361	SA-63133	-666
6427	-2.6	cp	BRD-A93477898	PETCM	Caspase activator
6423	-2.57	cp	BRD-A42571354	cetirizine	Histamine receptor antagonist
6419	-2.54	cp	BRD-K22193694	dioxybenzone	Topical sunscreen agent
6408	-2.48	cp	BRD-K95901403	XL-147	PI3K inhibitor
6402	-2.47	cp	BRD-K84566043	fenpiverinium	Acetylcholine receptor antagonist
6403	-2.47	cp	BRD-K04185004	oxybuprocaine	Local anesthetic
6404	-2.47	cp	BRD-K39670393	amthamine	Histamine receptor agonist
6405	-2.47	cp	BRD-K27710560	splitomycin	SIRT inhibitor
6396	-2.43	cp	BRD-K28029915	dolasetron	Serotonin receptor antagonist
6397	-2.43	cp	BRD-K32584078	BML-257	AKT inhibitor
6387	-2.4	cp	BRD-K52020312	metronidazole	DNA inhibitor
6388	-2.4	cp	BRD-K01902415	pirinixic-acid	PPAR receptor agonist
6389	-2.4	cp	BRD-K12867552	THM-I-94	HDAC inhibitor
6390	-2.4	cp	BRD-K32906660	bis-tyrphostin	EGFR inhibitor
6381	-2.39	cp	BRD-K11630072	carmofur	Thymidylate synthase inhibitor
6374	-2.36	cp	BRD-K92492521	LY-255283	Leukotriene receptor antagonist
6375	-2.36	cp	BRD-K72816382	cinalukast	Leukotriene receptor antagonist
6376	-2.36	cp	BRD-K08703257	3-amino-benzamide	PARP inhibitor
6366	-2.33	cp	BRD-K96670504	lonidamine	Glucokinase inhibitor
6367	-2.33	cp	BRD-A27143604	DPN	Estrogen receptor agonist
6368	-2.33	cp	BRD-K76304753	phenazopyridine	Local anesthetic
6351	-2.29	cp	BRD-K81855038	roxatidine	Histamine receptor antagonist
6352	-2.29	cp	BRD-K26134695	calpeptin	Calpain inhibitor
6353	-2.29	cp	BRD-K23922020	arecaidine	Acetylcholine receptor agonist
6356	-2.29	cp	BRD-K32318651	acyclovir	DNA polymerase inhibitor
6350	-2.28	cp	BRD-K20313525	rosmarinic-acid	GABA transaminase inhibitor
6337	-2.24	cp	BRD-K59574735	ubenimex	Leukotriene inhibitor
6341	-2.24	cp	BRD-K33453211	levocabastine	Histamine receptor antagonist
6333	-2.22	cp	BRD-K37516142	idebenone	Calcium channel modulator
6334	-2.22	cp	BRD-A41250306	cyclopenthiazide	Thiazide diuretic
6335	-2.22	cp	BRD-A02759312	betaxolol	Adrenergic receptor antagonist
6325	-2.21	cp	BRD-K89626439	sirolimus	MTOR inhibitor
6323	-2.19	cp	BRD-K17953061	staurosporine	PKC inhibitor
6313	-2.16	cp	BRD-K95992530	Cyclo-[Arg-Gly-Asp-D-Phe-Val]	integrin antagonist
6307	-2.15	cp	BRD-K86465814	HO-013	PPAR receptor agonist
6308	-2.15	cp	BRD-K18905250	ST-91	Adrenergic receptor agonist
6309	-2.15	cp	BRD-K09764130	mead-ethanolamide	Cannabinoid receptor agonist
6310	-2.15	cp	BRD-A85587465	bemesetron	Serotonin receptor antagonist
6311	-2.15	cp	BRD-K34092021	arvanil	TRPV agonist
6312	-2.15	cp	BRD-A08003242	rhodomyrtoxin-b	sodium fluorescein uptake inhibitor
6304	-2.14	cp	BRD-A36471396	biperiden	Acetylcholine receptor antagonist
6296	-2.11	cp	BRD-K48722833	iloperidone	Dopamine receptor antagonist
6297	-2.11	cp	BRD-K58772419	AZD-6482	PI3K inhibitor
6294	-2.1	cp	BRD-K99291625	SB-203580	p38 MAPK inhibitor
6291	-2.08	cp	BRD-K50387473	XMD-892	MAP kinase inhibitor
6272	-2.02	cp	BRD-K62609077	scoulerine	Adrenergic receptor antagonist
6270	-2.01	cp	BRD-K99498722	NPI-2358	Tubulin inhibitor
6271	-2.01	cp	BRD-A03816571	CP-55940	Cannabinoid receptor agonist
6263	-1.97	cp	BRD-K07996107	harpagoside	Acetylcholinesterase inhibitor
6258	-1.94	cp	BRD-K64614248	salicin	Anti-inflammatory
6259	-1.94	cp	BRD-K20152659	gamma-homolinolenic-acid	Cholesterol inhibitor
6251	-1.93	cp	BRD-A01145011	zebularine	DNA methyltransferase inhibitor
6247	-1.92	cp	BRD-K33308633	INCA-6	Calcineurin inhibitor
6244	-1.91	cp	BRD-K14880289	GW-501516	PPAR receptor agonist
6237	-1.9	cp	BRD-K82795137	loratadine	Histamine receptor antagonist
6238	-1.9	cp	BRD-K29905972	axitinib	PDGFR receptor inhibitor
6239	-1.9	cp	BRD-K34437622	BRD-K34437622	Thymidylate synthase inhibitor
6240	-1.9	cp	BRD-K82823076	RO-15-4513	GABA benzodiazepine site receptor inverse agonist
6234	-1.89	cp	BRD-K35629949	SR-27897	CCK receptor antagonist
6228	-1.87	cp	BRD-A20968261	WAY-213613	Glutamate inhibitor
6229	-1.87	cp	BRD-A75478957	PD-166793	Metalloproteinase inhibitor
6233	-1.87	cp	BRD-K46211610	tolazoline	Adrenergic receptor antagonist
6227	-1.86	cp	BRD-K32412559	morphothebaine	Adrenergic receptor antagonist
6218	-1.83	cp	BRD-K93331255	lypressin	Vasopressin receptor agonist
6219	-1.83	cp	BRD-K64835161	BRD-K64835161	-666
6220	-1.83	cp	BRD-K45435259	SCH-23390	Dopamine receptor antagonist
6208	-1.8	cp	BRD-K74761218	WT-171	HDAC inhibitor
6209	-1.8	cp	BRD-K91243525	SR-142948	Neurotensin receptor antagonist
6210	-1.8	cp	BRD-K29668683	BD-1063	Sigma receptor antagonist
6202	-1.79	cp	BRD-K89046952	ciclacillin	Bacterial cell wall synthesis inhibitor
6203	-1.79	cp	BRD-K40742111	baeomycesic-acid	Lipoxygenase inhibitor
6200	-1.77	cp	BRD-K09397065	SR-57227A	Serotonin receptor agonist
6193	-1.76	cp	BRD-K67174588	toremifene	Estrogen receptor antagonist
6194	-1.76	cp	BRD-K06792661	narciclasine	Coflilin signaling pathway activator
6195	-1.76	cp	BRD-K08502430	angiogenesis-inhibitor	Angiogenesis inhibitor
6189	-1.74	cp	BRD-K76872913	benzanthrone	Aromatic hydrocarbon derivative
6185	-1.73	cp	BRD-K26373640	IKK-2-inhibitor	IKK inhibitor
6186	-1.73	cp	BRD-K64044582	linoleamide	ACAT inhibitor
6187	-1.73	cp	BRD-K93258693	GW-9662	PPAR receptor antagonist
6177	-1.71	cp	BRD-K09668667	benzo(a)pyrene	Carcinogen
6170	-1.69	cp	BRD-K66206289	lobeline	Acetylcholine receptor antagonist
6171	-1.69	cp	BRD-K55591206	epigallocatechin	Nitric oxide synthase inhibitor
6172	-1.69	cp	BRD-K93441486	diphemanil	Acetylcholine receptor antagonist
6173	-1.69	cp	BRD-K78959463	FPL-64176	Calcium channel activator
6174	-1.69	cp	BRD-K37865504	LY-2183240	FAAH inhibitor
6160	-1.66	cp	BRD-K98521173	desoxycortone	Mineralocorticoid receptor agonist
6161	-1.66	cp	BRD-A85280935	quinpirole	Dopamine receptor agonist
6166	-1.66	cp	BRD-K06593056	LE-135	Retinoid receptor agonist
6159	-1.65	cp	BRD-K46212057	voriconazole	Cytochrome P450 inhibitor
6147	-1.62	cp	BRD-K04993501	cefixime	Bacterial cell wall synthesis inhibitor
6148	-1.62	cp	BRD-K53913732	SB-408124	Orexin receptor antagonist
6149	-1.62	cp	BRD-K57569181	pentoxifylline	Phosphodiesterase inhibitor
6155	-1.62	cp	BRD-K28470988	L-690330	Inositol monophosphatase inhibitor
6139	-1.59	cp	BRD-K52751261	TAK-715	p38 MAPK inhibitor
6140	-1.59	cp	BRD-K31843556	T-0070907	PPAR receptor antagonist
6141	-1.59	cp	BRD-K08998509	fananserin	Dopamine receptor antagonist
6142	-1.59	cp	BRD-K55430733	WAY-629	Serotonin receptor agonist
6130	-1.56	cp	BRD-A20126139	medrysone	Glucocorticoid receptor agonist
6131	-1.56	cp	BRD-K09635134	l-erythro-MAPP	negative control for D-erythro-MAPP
6132	-1.56	cp	BRD-K67043667	altretamine	DNA synthesis inhibitor
6121	-1.55	cp	BRD-K25079130	avrainvillamide-analog-4	nucleophosmin inhibitor
6122	-1.55	cp	BRD-A39646320	HC-toxin	HDAC inhibitor
6123	-1.55	cp	BRD-K10467831	tibolone	Androgen receptor agonist
6124	-1.55	cp	BRD-K54314721	zolmitriptan	Serotonin receptor agonist
6125	-1.55	cp	BRD-K25394294	oxaprozin	Cyclooxygenase inhibitor
6129	-1.55	cp	BRD-K41410256	balsalazide	Cyclooxygenase inhibitor
6120	-1.54	cp	BRD-K96527333	dehydroisoandosterone	GABA receptor modulator
6116	-1.53	cp	BRD-A18917088	estradiol	Contraceptive agent
6109	-1.52	cp	BRD-K80725632	lavendustin-c	EGFR inhibitor
6110	-1.52	cp	BRD-K81225797	SCH-58261	Adenosine receptor antagonist
6111	-1.52	cp	BRD-K13646352	midostaurin	FLT3 inhibitor
6112	-1.52	cp	BRD-K07762753	aminopurvalanol-a	Tyrosine kinase inhibitor
6113	-1.52	cp	BRD-K06388322	pramipexole	Dopamine receptor agonist
6099	-1.48	cp	BRD-K35240538	methylprednisolone	Glucocorticoid receptor agonist
6100	-1.48	cp	BRD-K28863208	PNU-282987	Cholinergic receptor agonist
6101	-1.48	cp	BRD-K22385716	LY-303511	Casein kinase inhibitor
6102	-1.48	cp	BRD-K45033733	famciclovir	DNA polymerase inhibitor
6096	-1.47	cp	BRD-A16700644	isoxsuprine	Adrenergic receptor agonist
6085	-1.44	cp	BRD-K96134740	kitasamycin	Protein synthesis inhibitor
6086	-1.44	cp	BRD-A47829399	artesunate	DNA synthesis inhibitor
6087	-1.44	cp	BRD-K19309090	SR-95639A	Acetylcholine receptor agonist
6088	-1.44	cp	BRD-K18799075	BAY-59-3074	Cannabinoid receptor partial agonist
6089	-1.44	cp	BRD-A95445494	maackiain	Sodium/glucose cotransporter inhibitor
6090	-1.44	cp	BRD-A00993607	alprenolol	Adrenergic receptor antagonist
6092	-1.44	cp	BRD-K67080878	milrinone	Phosphodiesterase inhibitor
6076	-1.41	cp	BRD-K09485525	GANT-61	GLI antagonist
6077	-1.41	cp	BRD-K64610608	EMF-bca1-57	caspase inhibitor
6069	-1.39	cp	BRD-K29178788	dictamnine	Furoquinoline alkaloid
6060	-1.37	cp	BRD-A75455249	kavain	Calcium channel modulator
6061	-1.37	cp	BRD-K17674993	diflorasone	Corticosteroid agonist
6062	-1.37	cp	BRD-K38003476	clocortolone	Glucocorticoid receptor agonist
6063	-1.37	cp	BRD-K68103045	CGS-20625	Benzodiazepine receptor agonist
6064	-1.37	cp	BRD-K51541829	RO-25-6981	Ionotropic glutamate receptor antagonist
6065	-1.37	cp	BRD-A97104540	fenoterol	Adrenergic receptor agonist
6066	-1.37	cp	BRD-K79425933	benperidol	Dopamine receptor antagonist
6050	-1.34	cp	BRD-K69840642	ISOX	HDAC inhibitor
6051	-1.34	cp	BRD-K51805276	temefos	Cholinesterase inhibitor
6052	-1.34	cp	BRD-K03670461	tyrphostin-AG-82	EGFR inhibitor
6057	-1.34	cp	BRD-K01663662	diphenidol	Acetylcholine receptor agonist
6058	-1.34	cp	BRD-A80213327	NSC-23766	Ras GTPase inhibitor
6046	-1.33	cp	BRD-K33483813	actarit	Interleukin receptor agonist
6047	-1.33	cp	BRD-K04010869	prostaglandin-a1	HSP inducer
6040	-1.31	cp	BRD-A35519318	benidipine	Calcium channel blocker
6033	-1.3	cp	BRD-A10355991	norketamine	Glutamate receptor antagonist
6034	-1.3	cp	BRD-K72024482	MRS-1754	Adenosine receptor antagonist
6035	-1.3	cp	BRD-K15791587	L-733060	Tachykinin antagonist
6036	-1.3	cp	BRD-K12906962	dichlorobenzamil	Sodium/calcium exchange inhibitor
6037	-1.3	cp	BRD-A17428743	BW-723C86	Serotonin receptor agonist
6039	-1.3	cp	BRD-A44008656	doxylamine	Histamine receptor antagonist
6027	-1.28	cp	BRD-K14329163	BAY-K8644	Calcium channel activator
6022	-1.27	cp	BRD-K13800121	parecoxib	Cyclooxygenase inhibitor
6023	-1.27	cp	BRD-K72029282	probucol	Atherogenesis inhibitor
6025	-1.27	cp	BRD-A81233518	glycopyrrolate	Acetylcholine receptor antagonist
6026	-1.27	cp	BRD-A95869247	indapamide	Thiazide diuretic
6019	-1.26	cp	BRD-A48570745	ivermectin	GABA receptor agonist
6011	-1.23	cp	BRD-A39415247	norethisterone	Progesterone receptor agonist
6012	-1.23	cp	BRD-K38323065	phenacetin	Cyclooxygenase inhibitor
6013	-1.23	cp	BRD-K67017579	cilostazol	Phosphodiesterase inhibitor
6014	-1.23	cp	BRD-A65671304	candesartan	Angiotensin receptor antagonist
6000	-1.2	cp	BRD-K36324071	NF-449	Purinergic receptor antagonist
6001	-1.2	cp	BRD-K51816706	oxindole-I	VEGFR inhibitor
6002	-1.2	cp	BRD-K00610438	altanserin	Serotonin receptor antagonist
6003	-1.2	cp	BRD-A22844106	tenoxicam	Cyclooxygenase inhibitor
6006	-1.2	cp	BRD-A09533288	verapamil	Calcium channel blocker
5983	-1.16	cp	BRD-K39983086	loteprednol	Glucocorticoid receptor agonist
5984	-1.16	cp	BRD-K66896231	BRD-K66896231	Acetylcholinesterase inhibitor
5985	-1.16	cp	BRD-K67831364	ZM-323881	VEGFR inhibitor
5986	-1.16	cp	BRD-K09549677	mibefradil	T-type calcium channel blocker
5987	-1.16	cp	BRD-K43290182	Ro-04-6790	Serotonin receptor antagonist
5988	-1.16	cp	BRD-K05395900	nicotine	Acetylcholine receptor agonist
5989	-1.16	cp	BRD-K05673000	dicloxacillin	Bacterial cell wall synthesis inhibitor
5981	-1.15	cp	BRD-K46556543	canrenoic-acid	Mineralocorticoid receptor antagonist
5971	-1.13	cp	BRD-K40892394	AR-C133057XX	Nitric oxide synthase inhibitor
5972	-1.13	cp	BRD-A73605923	mocimycin	Protein synthesis inhibitor
5973	-1.13	cp	BRD-K15409150	penfluridol	T-type calcium channel blocker
5974	-1.13	cp	BRD-A62021152	WAY-161503	Serotonin receptor agonist
5978	-1.13	cp	BRD-K02265150	amoxapine	Norepinephrine reuptake inhibitor
5967	-1.11	cp	BRD-K78838262	austricine	Hypolipidemic
5963	-1.09	cp	BRD-A11007541	BCI-hydrochloride	Protein phosphatase inhibitor
5964	-1.09	cp	BRD-K38251852	paxilline	Potassium channel blocker
5965	-1.09	cp	BRD-A95939040	sertaconazole	Sterol demethylase inhibitor
5954	-1.06	cp	BRD-K01493881	apigenin	Casein kinase inhibitor
5955	-1.06	cp	BRD-K13664374	dichloroacetic-acid	Pyruvate dehydrogenase kinase inhibitor
5956	-1.06	cp	BRD-A90311807	cilastatin	Dehydropeptidase inhibitor
5957	-1.06	cp	BRD-K45330754	diethylstilbestrol	Estrogen receptor agonist
5959	-1.06	cp	BRD-K50398167	meclofenamic-acid	Cyclooxygenase inhibitor
5960	-1.06	cp	BRD-K32247306	primidone	GABA receptor antagonist
5940	-1.02	cp	BRD-K48923948	BMS-641988	Androgen receptor antagonist
5941	-1.02	cp	BRD-A20131130	2',5'-dideoxyadenosine	Adenylyl cyclase inhibitor
5942	-1.02	cp	BRD-A06726973	dibutyrylcyclic-gmp	cGMP analog
5943	-1.02	cp	BRD-K68867920	quetiapine	Dopamine receptor antagonist
5947	-1.02	cp	BRD-K97810537	beclometasone	Glucocorticoid receptor agonist
5948	-1.02	cp	BRD-K47207162	zimelidine	Serotonin reuptake inhibitor
5931	-0.99	cp	BRD-A51410489	yohimbine	Adrenergic receptor antagonist
5932	-0.99	cp	BRD-A41941932	vitexin	Antioxidant
5933	-0.99	cp	BRD-K13926615	vardenafil	Phosphodiesterase inhibitor
5934	-0.99	cp	BRD-K76274772	MAPP-D-erythro	Ceramidase inhibitor
5935	-0.99	cp	BRD-K51662849	ilomastat	Matrix metalloprotease inhibitor
5937	-0.99	cp	BRD-K93461745	buspirone	Serotonin receptor agonist
5918	-0.95	cp	BRD-K28143534	cyproheptadine	Histamine receptor antagonist
5919	-0.95	cp	BRD-K26160755	RS-45041-190	Imidazoline receptor agonist
5920	-0.95	cp	BRD-K87158025	benzamil	Sodium channel blocker
5922	-0.95	cp	BRD-K54256913	MK-1775	WEE1 kinase inhibitor
5923	-0.95	cp	BRD-A51714012	venlafaxine	Adrenergic inhibitor
5917	-0.93	cp	BRD-K57546357	prunetin	Breast cancer resistance protein inhibitor
5905	-0.92	cp	BRD-K47278471	diphenhydramine	Histamine receptor antagonist
5906	-0.92	cp	BRD-K25875056	SC-9	Protein tyrosine kinase activator
5907	-0.92	cp	BRD-K24675965	LY-288513	CCK receptor antagonist
5908	-0.92	cp	BRD-K65285700	BRD-K65285700	Cannabinoid receptor agonist
5909	-0.92	cp	BRD-K39339537	epirizole	Cyclooxygenase inhibitor
5910	-0.92	cp	BRD-A96485169	EBPC	Aldose reductase inhibitor
5911	-0.92	cp	BRD-A10420615	cyclopiazonic-acid	ATPase inhibitor
5913	-0.92	cp	BRD-K36862742	hydroflumethiazide	Sodium/potassium/chloride transporter inhibitor
5901	-0.89	cp	BRD-K51918615	iodophenpropit	Histamine receptor antagonist
5896	-0.88	cp	BRD-A43082555	loxoprofen	Cyclooxygenase inhibitor
5897	-0.88	cp	BRD-K22227508	targinine	Nitric oxide synthase inhibitor
5898	-0.88	cp	BRD-K51066026	aminoindazole	Ionophore
5899	-0.88	cp	BRD-K64341947	CFM-1571	Guanylate cyclase activator
5900	-0.88	cp	BRD-A73368467	fexofenadine	Histamine receptor antagonist
5884	-0.85	cp	BRD-K54416256	methimazole	Antithyroid
5885	-0.85	cp	BRD-A41450521	tosufloxacin	Bacterial DNA gyrase inhibitor
5886	-0.85	cp	BRD-K26863634	BIX-01338	Histone lysine methyltransferase inhibitor
5887	-0.85	cp	BRD-A73680854	PT-630	Dipeptidyl peptidase inhibitor
5888	-0.85	cp	BRD-K75641298	metoclopramide	Dopamine receptor antagonist
5889	-0.85	cp	BRD-K74195153	irsogladine	Phosphodiesterase inhibitor
5890	-0.85	cp	BRD-K03600606	catechin	Beta secretase inhibitor
5891	-0.85	cp	BRD-K41996876	tyrphostin-1	EGFR inhibitor
5892	-0.85	cp	BRD-A33168282	sotalol	Adrenergic receptor antagonist
5893	-0.85	cp	BRD-K99946902	hexylresorcinol	Local anesthetic
5895	-0.85	cp	BRD-K76205745	losartan	Angiotensin receptor antagonist
5881	-0.84	cp	BRD-K50866992	tropisetron	Serotonin receptor antagonist
5883	-0.84	cp	BRD-A87606379	nadolol	Adrenergic receptor antagonist
5872	-0.82	cp	BRD-A93206962	L-755507	Adrenergic receptor agonist
5863	-0.81	cp	BRD-K11717138	benzbromarone	Chloride channel blocker
5864	-0.81	cp	BRD-K41260949	valproic-acid	HDAC inhibitor
5865	-0.81	cp	BRD-K76568384	PHTPP	Estrogen receptor antagonist
5866	-0.81	cp	BRD-A80641450	FR-139317	Endothelin receptor antagonist
5868	-0.81	cp	BRD-K47639036	flavoxate	Acetylcholine receptor antagonist
5869	-0.81	cp	BRD-A86044036	flurbiprofen	Cyclooxygenase inhibitor
5870	-0.81	cp	BRD-A37837077	cyclazosin	Adrenergic receptor antagonist
5860	-0.79	cp	BRD-K99922388	DPO-1	Potassium channel blocker
5851	-0.78	cp	BRD-K97863768	prothionamide	Mycobacterium tuberculosis enoyl-[acyl-carrier-protein] reductase [NADH] (inhA) inhibitor
5852	-0.78	cp	BRD-K16551401	PNU-22394	Serotonin receptor agonist
5853	-0.78	cp	BRD-K94080537	diethyltoluamide	DEET activator of fly antenna ionotropic receptor IR40a
5854	-0.78	cp	BRD-A69636825	diltiazem	Calcium channel blocker
5855	-0.78	cp	BRD-K56343971	vemurafenib	RAF inhibitor
5856	-0.78	cp	BRD-K71289571	zafirlukast	Leukotriene receptor antagonist
5839	-0.74	cp	BRD-K94887716	TFMPP	Serotonin receptor agonist
5840	-0.74	cp	BRD-K67847053	guanabenz	Adrenergic receptor agonist
5845	-0.74	cp	BRD-A18043272	phensuximide	Succinimide antiepileptic
5846	-0.74	cp	BRD-A36074203	remacemide	Glutamate receptor antagonist
5847	-0.74	cp	BRD-K12102668	nialamide	Monoamine oxidase inhibitor
5834	-0.71	cp	BRD-K33193182	methylnorlichexanthone	Aurora kinase inhibitor
5821	-0.7	cp	BRD-K68065987	MK-2206	AKT inhibitor
5822	-0.7	cp	BRD-K46142322	RS-67333	Serotonin receptor partial agonist
5823	-0.7	cp	BRD-K82823804	SA-792987	PKC inhibitor
5824	-0.7	cp	BRD-K10042277	desmethylclozapine	Acetylcholine receptor agonist
5825	-0.7	cp	BRD-K28806945	L-750667	Dopamine receptor antagonist
5826	-0.7	cp	BRD-K01815685	indole	aryl hydrocarbon receptor agonist
5827	-0.7	cp	BRD-K04146668	GW-441756	Growth factor receptor inhibitor
5828	-0.7	cp	BRD-K76534306	enrofloxacin	Bacterial DNA gyrase inhibitor
5829	-0.7	cp	BRD-K84663978	trequinsin	Phosphodiesterase inhibitor
5830	-0.7	cp	BRD-K41564320	purvalanol-b	Tyrosine kinase inhibitor
5831	-0.7	cp	BRD-K07691486	roscovitine	CDK inhibitor
5832	-0.7	cp	BRD-K30649484	mafenide	Carbonic anhydrase inhibitor
5833	-0.7	cp	BRD-K36927236	glibenclamide	Sulfonylurea
5817	-0.69	cp	BRD-K27351809	nomegestrol	Progesterone receptor agonist
5814	-0.68	cp	BRD-K57179821	crotamiton	Antipruritic
5806	-0.67	cp	BRD-K87024524	phenelzine	Monoamine oxidase inhibitor
5807	-0.67	cp	BRD-K61314889	IWR-1-ENDO	PARP inhibitor
5808	-0.67	cp	BRD-K88625236	nonoxynol-9	Membrane integrity inhibitor
5809	-0.67	cp	BRD-A45140972	meclocycline	Bacterial 30S ribosomal subunit inhibitor
5810	-0.67	cp	BRD-A16332958	modafinil	Adrenergic receptor agonist
5811	-0.67	cp	BRD-K71430621	clobenpropit	Histamine receptor antagonist
5812	-0.67	cp	BRD-A42831637	tetrahydrocannabinol-7-oic-acid	Anti-inflammatory
5813	-0.67	cp	BRD-K11129031	gemfibrozil	Lipoprotein lipase activator
5804	-0.66	cp	BRD-K34170797	fexaramine	FXR agonist
5789	-0.63	cp	BRD-K45158365	valsartan	Angiotensin receptor antagonist
5790	-0.63	cp	BRD-K96144918	mead-acid	KPL-1 tumor suppressor
5791	-0.63	cp	BRD-K61401890	deguelin	NADH-ubiquinone oxidoreductase (Complex I) inhibitor
5792	-0.63	cp	BRD-K91904471	SD-169	p38 MAPK inhibitor
5794	-0.63	cp	BRD-K49111258	prazosin	Adrenergic receptor antagonist
5795	-0.63	cp	BRD-K75089421	procainamide	Sodium channel blocker
5796	-0.63	cp	BRD-K12994359	valdecoxib	Cyclooxygenase inhibitor
5797	-0.63	cp	BRD-K35960502	niclosamide	DNA replication inhibitor
5778	-0.6	cp	BRD-K28346421	rifapentine	RNA polymerase inhibitor
5779	-0.6	cp	BRD-A00100033	nifurtimox	DNA inhibitor
5780	-0.6	cp	BRD-K43330982	JTE-013	Lysophospholipid receptor antagonist
5781	-0.6	cp	BRD-K41713976	E-4031	Potassium channel blocker
5784	-0.6	cp	BRD-K88560311	rucaparib	PARP inhibitor
5785	-0.6	cp	BRD-A30435184	metergoline	Dopamine receptor agonist
5773	-0.57	cp	BRD-K39987650	bisacodyl	Laxative
5761	-0.56	cp	BRD-K92817986	BJM-CSC-19	MEK inhibitor
5762	-0.56	cp	BRD-K01192156	tyrphostin-AG-112	Protein tyrosine kinase inhibitor
5763	-0.56	cp	BRD-K82561139	ricinine	Casein kinase inhibitor
5764	-0.56	cp	BRD-K47150025	KI-8751	VEGFR inhibitor
5766	-0.56	cp	BRD-A33447119	oxfendazole	Anthelmintic
5767	-0.56	cp	BRD-A83937277	mephenytoin	Hydantoin antiepileptic
5768	-0.56	cp	BRD-K89348303	ramipril	ACE inhibitor
5769	-0.56	cp	BRD-K07888107	depudecin	HDAC inhibitor
5770	-0.56	cp	BRD-A19500257	geldanamycin	HSP inhibitor
5771	-0.56	cp	BRD-K09907482	PRL-3-inhibitor-I	Tyrosine phosphatase inhibitor
5758	-0.54	cp	BRD-K79366068	PSB-069	NTPDase inhibitor
5754	-0.53	cp	BRD-A23359898	sibutramine	Serotonin reuptake inhibitor
5755	-0.53	cp	BRD-K59273480	propentofylline	Adenosine reuptake inhibitor
5756	-0.53	cp	BRD-A04706586	bucladesine	Adenosine receptor agonist
5744	-0.49	cp	BRD-A64297288	amlodipine	Calcium channel blocker
5745	-0.49	cp	BRD-K02113016	olaparib	PARP inhibitor
5746	-0.49	cp	BRD-K08619838	tremorine	Acetylcholine receptor agonist
5747	-0.49	cp	BRD-K17008822	BD-1008	Sigma receptor antagonist
5748	-0.49	cp	BRD-K14920963	erythrosine	Coloring agent
5749	-0.49	cp	BRD-K39120595	bithionol	Autotaxin inhibitor
5750	-0.49	cp	BRD-K04877770	FTase-inhibitor-B581	Farnesyltransferase inhibitor
5733	-0.46	cp	BRD-K88679075	methandriol	Androgenic steroid
5734	-0.46	cp	BRD-K86887724	dofetilide	Potassium channel blocker
5735	-0.46	cp	BRD-K77171813	proxyfan	Histamine receptor modulator
5736	-0.46	cp	BRD-K33211335	dextromethorphan	Glutamate receptor antagonist
5737	-0.46	cp	BRD-K83063356	RS-102895	CCR antagonist
5738	-0.46	cp	BRD-K35941380	methysergide	Serotonin receptor antagonist
5739	-0.46	cp	BRD-K62736196	guanabenz	-666
5741	-0.46	cp	BRD-K68507560	dicycloverine	Acetylcholine receptor antagonist
5742	-0.46	cp	BRD-A47598013	citalopram	Serotonin reuptake inhibitor
5731	-0.44	cp	BRD-K73196317	urapidil	Adrenergic receptor antagonist
5719	-0.42	cp	BRD-K00532621	midazolam	Benzodiazepine receptor agonist
5720	-0.42	cp	BRD-K43860855	iobenguane	Antineoplastic
5721	-0.42	cp	BRD-K08890269	CO-102862	Sodium channel blocker
5722	-0.42	cp	BRD-K06854232	AM-580	Retinoid receptor agonist
5723	-0.42	cp	BRD-K55344148	BU-224	Imidazoline receptor ligand
5724	-0.42	cp	BRD-K47631482	bromhexine	Mucolytic agent
5727	-0.42	cp	BRD-A29901043	KIN001-127	ITK inhibitor
5728	-0.42	cp	BRD-K53857191	risperidone	Dopamine receptor antagonist
5729	-0.42	cp	BRD-K43887077	dopamine	Dopamine receptor agonist
5730	-0.42	cp	BRD-K79254416	decitabine	DNA methyltransferase inhibitor
5708	-0.39	cp	BRD-K16444452	ibudilast	Leukotriene receptor antagonist
5709	-0.39	cp	BRD-K59256312	gabexate	Serine protease inhibitor
5710	-0.39	cp	BRD-A57382968	piroxicam	Cyclooxygenase inhibitor
5711	-0.39	cp	BRD-K50660797	epicatechin	Bacterial DNA gyrase inhibitor
5712	-0.39	cp	BRD-K20482099	rutin	Antioxidant
5713	-0.39	cp	BRD-K59369769	tozasertib	Aurora kinase inhibitor
5714	-0.39	cp	BRD-K52313696	tacedinaline	HDAC inhibitor
5715	-0.39	cp	BRD-A26384407	chlortalidone	Carbonic anhydrase inhibitor
5716	-0.39	cp	BRD-A65280694	molindone	Dopamine receptor antagonist
5692	-0.35	cp	BRD-A98378129	talniflumate	Cyclooxygenase inhibitor
5693	-0.35	cp	BRD-K67537649	PQ-401	IGF-1 inhibitor
5694	-0.35	cp	BRD-K95202259	ML-3163	p38 MAPK inhibitor
5695	-0.35	cp	BRD-A63043573	cabergoline	Dopamine receptor agonist
5696	-0.35	cp	BRD-K70778732	trazodone	Adrenergic receptor antagonist
5697	-0.35	cp	BRD-A72703248	SKF-96365	Calcium channel blocker
5698	-0.35	cp	BRD-K64052750	gefitinib	EGFR inhibitor
5699	-0.35	cp	BRD-K50859149	sulfafurazole	Bacterial antifolate
5700	-0.35	cp	BRD-K19295594	gossypol	BCL inhibitor
5674	-0.32	cp	BRD-K30563334	rifabutin	Protein synthesis inhibitor
5675	-0.32	cp	BRD-A52282606	lacidipine	Calcium channel blocker
5676	-0.32	cp	BRD-K52080565	rilmenidine	Imidazoline receptor agonist
5677	-0.32	cp	BRD-K62965247	tipifarnib-P2	farnesyltransferase inhibitor
5678	-0.32	cp	BRD-A02481876	importazole	Importin-beta transport receptor inhibitor
5679	-0.32	cp	BRD-A41833852	naloxone	Opioid receptor antagonist
5680	-0.32	cp	BRD-K94841585	emodic-acid	Laxative
5681	-0.32	cp	BRD-K64514229	toltrazuril	Antiprotozoal
5682	-0.32	cp	BRD-A09467419	mebeverine	Acetylcholine receptor antagonist
5683	-0.32	cp	BRD-K59753853	MDL-29951	Glutamate receptor antagonist
5684	-0.32	cp	BRD-K86301799	dipyridamole	Phosphodiesterase inhibitor
5686	-0.32	cp	BRD-A92670106	tocainide	Sodium channel blocker
5687	-0.32	cp	BRD-K28183345	proguanil	Dihydrofolate reductase inhibitor
5688	-0.32	cp	BRD-K68132782	terbinafine	Fungal squalene epoxidase inhibitor
5689	-0.32	cp	BRD-A17655518	ibuprofen	Cyclooxygenase inhibitor
5690	-0.32	cp	BRD-K09778810	FGIN-1-27	Inositol monophosphatase inhibitor
5659	-0.28	cp	BRD-K98493452	honokiol	AKT inhibitor
5660	-0.28	cp	BRD-A56892734	esomeprazole	ATPase inhibitor
5661	-0.28	cp	BRD-K40902647	vincamine	Adrenergic receptor antagonist
5662	-0.28	cp	BRD-K88759641	EMD-66684	Angiotensin receptor antagonist
5663	-0.28	cp	BRD-K06221026	DUP-697	Cyclooxygenase inhibitor
5664	-0.28	cp	BRD-K80315159	DPPE	Histamine receptor antagonist
5665	-0.28	cp	BRD-A54880345	etomidate	GABA receptor modulator
5667	-0.28	cp	BRD-K67261995	adipiodone	Contrast agent
5668	-0.28	cp	BRD-K97764662	PD-173074	FGFR inhibitor
5669	-0.28	cp	BRD-A09094913	strychnine	Acetylcholine receptor antagonist
5654	-0.26	cp	BRD-K16336526	capsaicin	TRPV agonist
5640	-0.25	cp	BRD-K81528515	nilotinib	ABL inhibitor
5641	-0.25	cp	BRD-K32744045	disulfiram	Aldehyde dehydrogenase inhibitor
5642	-0.25	cp	BRD-A24191444	ifenprodil	Adrenergic receptor antagonist
5643	-0.25	cp	BRD-K83322645	L-693403	Sigma receptor agonist
5644	-0.25	cp	BRD-K97181089	amiloride	Sodium channel blocker
5645	-0.25	cp	BRD-A72988804	tiaprofenic-acid	Cyclooxygenase inhibitor
5646	-0.25	cp	BRD-K46317332	proadifen	Nitric oxide synthase inhibitor
5647	-0.25	cp	BRD-K76587808	fraxetin	Antioxidant
5648	-0.25	cp	BRD-A50675702	fipronil	GABA gated chloride channel blocker
5649	-0.25	cp	BRD-A91452556	estradiol-cypionate	Estrogen receptor agonist
5650	-0.25	cp	BRD-A80017228	bendroflumethiazide	Sodium/potassium/chloride transporter inhibitor
5651	-0.25	cp	BRD-K68264559	brimonidine	Adrenergic receptor agonist
5652	-0.25	cp	BRD-K00234327	RU-24969	Serotonin receptor agonist
5653	-0.25	cp	BRD-A45889380	mepacrine	Cytokine production inhibitor
5629	-0.21	cp	BRD-A19633847	perhexiline	Carnitine palmitoyltransferase inhibitor
5630	-0.21	cp	BRD-A89337244	PD-102807	Acetylcholine receptor antagonist
5631	-0.21	cp	BRD-A14395271	mesoridazine	Dopamine receptor antagonist
5632	-0.21	cp	BRD-K81839095	estrone	Estrogen receptor agonist
5633	-0.21	cp	BRD-K18909381	CGS-12066B	Serotonin receptor agonist
5634	-0.21	cp	BRD-A11678676	wortmannin	PI3K inhibitor
5635	-0.21	cp	BRD-K52219182	BRD-K52219182	Phosphodiesterase inhibitor
5636	-0.21	cp	BRD-K63945320	dihydrosamidin	Phospholipase inhibitor
5637	-0.21	cp	BRD-K19540840	saracatinib	SRC inhibitor
5638	-0.21	cp	BRD-K46424862	hymecromone	Monoamine oxidase inhibitor
5628	-0.2	cp	BRD-A92537424	danazol	Estrogen receptor antagonist
5613	-0.18	cp	BRD-K89125793	tinidazole	Antiprotozoal
5614	-0.18	cp	BRD-K73397362	purmorphamine	Smoothened receptor agonist
5615	-0.18	cp	BRD-A41112154	oleanolic-acid	G protein-coupled receptor agonist
5616	-0.18	cp	BRD-K09416995	lovastatin	HMGCR inhibitor
5617	-0.18	cp	BRD-A50684349	fenoldopam	Dopamine receptor agonist
5618	-0.18	cp	BRD-K08547377	irinotecan	Topoisomerase inhibitor
5619	-0.18	cp	BRD-A31575449	CGP-20712	Adrenergic receptor antagonist
5620	-0.18	cp	BRD-K57304726	PRE-084	Sigma receptor agonist
5621	-0.18	cp	BRD-K40901640	cinanserin	Serotonin receptor antagonist
5622	-0.18	cp	BRD-A29485665	bicalutamide	Androgen receptor antagonist
5623	-0.18	cp	BRD-A39230911	chlorphensin	Muscle relaxant
5602	-0.14	cp	BRD-A48261811	argatroban	Thrombin inhibitor
5603	-0.14	cp	BRD-K37561857	zardaverine	Phosphodiesterase inhibitor
5604	-0.14	cp	BRD-K57033106	tripelennamine	Histamine receptor antagonist
5605	-0.14	cp	BRD-K73999723	telmisartan	Angiotensin receptor antagonist
5606	-0.14	cp	BRD-K72676686	fluvoxamine	Selective serotonin reuptake inhibitor (SSRI)
5607	-0.14	cp	BRD-K17378184	prestwick-559	Dopamine receptor agonist
5608	-0.14	cp	BRD-K54210043	NS-1619	Calcium channel activator
5609	-0.14	cp	BRD-K79092138	nitrofural	Bacterial DNA inhibitor
5587	-0.11	cp	BRD-K49481516	galantamine	Acetylcholinesterase inhibitor
5588	-0.11	cp	BRD-K93332168	isocarboxazid	Monoamine oxidase inhibitor
5589	-0.11	cp	BRD-K28578425	cilostamide	Phosphodiesterase inhibitor
5590	-0.11	cp	BRD-A62525898	prednisone	Glucocorticoid receptor agonist
5591	-0.11	cp	BRD-K57222227	indometacin	Cyclooxygenase inhibitor
5592	-0.11	cp	BRD-K92049597	triamterene	Sodium channel blocker
5593	-0.11	cp	BRD-K38197229	bumetanide	Solute carrier family member inhibitor
5594	-0.11	cp	BRD-K92000912	AM-251	Cannabinoid receptor antagonist
5595	-0.11	cp	BRD-K82135108	elesclomol	Oxidative stress inducer
5596	-0.11	cp	BRD-A38030642	cyclosporin-a	Calcineurin inhibitor
5597	-0.11	cp	BRD-K03816923	rottlerin	MAP kinase inhibitor
5598	-0.11	cp	BRD-K38436528	imipramine	Norepinephrine reuptake inhibitor
5584	-0.09	cp	BRD-K77925998	quipazine	Serotonin receptor agonist
5574	-0.07	cp	BRD-K04196797	oxcarbazepine	Sodium channel blocker
5575	-0.07	cp	BRD-K82357231	desloratadine	Histamine receptor antagonist
5576	-0.07	cp	BRD-A93659613	GR-89696	Opioid receptor agonist
5577	-0.07	cp	BRD-K08287586	butylparaben	DNA synthesis inhibitor
5578	-0.07	cp	BRD-K65417056	meprylcaine	Local anesthetic
5579	-0.07	cp	BRD-A09472452	flecainide	Sodium channel blocker
5580	-0.07	cp	BRD-A66435872	HTMT	Histamine receptor agonist
5564	-0.04	cp	BRD-A26334849	propafenone	Antiarrhythmic
5565	-0.04	cp	BRD-K30480208	torasemide	Electrolyte reabsorption inhibitor
5566	-0.04	cp	BRD-A79981887	midodrine	Adrenergic receptor agonist
5567	-0.04	cp	BRD-K56429665	calcipotriol	Vitamin D receptor agonist
5555	-0.03	cp	BRD-A19248578	latrunculin-b	Actin polymerization inhibitor
5556	-0.03	cp	BRD-A30655177	LFM-A13	BTK inhibitor
5557	-0.03	cp	BRD-K99107520	felbamate	Glutamate receptor antagonist
5558	-0.03	cp	BRD-K54771420	glycocholic-acid	Cholesterol inhibitor
5559	-0.03	cp	BRD-K49049886	CGS-15943	Adenosine receptor antagonist
5560	-0.03	cp	BRD-A48430263	pioglitazone	Insulin sensitizer
5561	-0.03	cp	BRD-K85119730	tolbutamide	ATP channel blocker
5562	-0.03	cp	BRD-K96354014	nifedipine	Calcium channel blocker
5542	-0.02	cp	BRD-K04466929	Merck60	HDAC inhibitor
5543	-0.02	cp	BRD-A34817987	itraconazole	Cytochrome P450 inhibitor
5544	-0.02	cp	BRD-A97674275	ranolazine	Sodium channel blocker
5545	-0.02	cp	BRD-K94441233	mevastatin	HMGCR inhibitor
5546	-0.02	cp	BRD-K15715913	fluperlapine	Serotonin receptor antagonist
5547	-0.02	cp	BRD-K59332007	linopirdine	Potassium channel blocker
5548	-0.02	cp	BRD-A49160188	donepezil	Acetylcholinesterase inhibitor
5549	-0.02	cp	BRD-K06895174	cisapride	Serotonin receptor agonist
5550	-0.02	cp	BRD-A10523515	GSK-429286A	Rho associated kinase inhibitor
5551	-0.02	cp	BRD-K22031190	diflunisal	Prostanoid receptor antagonist
5533	-0.01	cp	BRD-K17561142	amiodarone	Potassium channel blocker
5534	-0.01	cp	BRD-K13032584	procarbazine	Monoamine oxidase inhibitor
5535	-0.01	cp	BRD-K91699951	benzonatate	Local anesthetic
5536	-0.01	cp	BRD-K12219985	glipizide	Sulfonylurea
5537	-0.01	cp	BRD-K78126613	menadione	Mitochondrial DNA polymerase inhibitor
5538	-0.01	cp	BRD-K20755323	SA-792728	Sphingosine kinase inhibitor
1545	0	cp	BRD-K75295174	alisertib	Aurora kinase inhibitor
1546	0	cp	BRD-K53665955	MK-5108	Aurora kinase inhibitor
1547	0	cp	BRD-K79877282	PF-543	Sphingosine kinase inhibitor
1548	0	cp	BRD-K61691971	avrainvillamide-analog-1	nucleophosmin inhibitor
1549	0	cp	BRD-K42573370	avrainvillamide-analog-2	nucleophosmin inhibitor
1550	0	cp	BRD-A70731303	avrainvillamide-analog-5	nucleophosmin inhibitor
2233	0	cp	BRD-A15493168	tetracycline	Bacterial 30S ribosomal subunit inhibitor
2234	0	cp	BRD-K82216340	medroxyprogesterone	progesterone receptor agonist
2235	0	cp	BRD-A51182606	chloramphenicol	Protein synthesis inhibitor
2236	0	cp	BRD-K54529596	captopril	ACE inhibitor
2237	0	cp	BRD-K90864987	cobalt(II)-chloride	HSP inducer
2238	0	cp	BRD-K67977190	eprosartan	Angiotensin receptor antagonist
2239	0	cp	BRD-K37814297	acepromazine	Dopamine receptor antagonist
2240	0	cp	BRD-K20197062	SA-94315	Caspase inhibitor
2241	0	cp	BRD-A80928489	1-monopalmitin	P-glycoprotein inhibitor
2242	0	cp	BRD-A15914070	4-hydroxy-2-nonenal	Cytotoxic lipid peroxidation product
2243	0	cp	BRD-K36627727	tamibarotene	Retinoid receptor agonist
2244	0	cp	BRD-K54472332	elvitegravir	HIV integrase inhibitor
2245	0	cp	BRD-K70557564	zosuquidar	P-glycoprotein inhibitor
2246	0	cp	BRD-K07265709	razoxane	Chelating agent
2247	0	cp	BRD-M16762496	PIK-75	DNA protein kinase inhibitor
2248	0	cp	BRD-K17306061	aprepitant	Tachykinin antagonist
2249	0	cp	BRD-K16485616	mocetinostat	HDAC inhibitor
2250	0	cp	BRD-K13514097	everolimus	MTOR inhibitor
2251	0	cp	BRD-K67578145	GDC-0879	RAF inhibitor
2252	0	cp	BRD-K74514084	pazopanib	KIT inhibitor
2253	0	cp	BRD-K99749624	linifanib	PDGFR receptor inhibitor
2254	0	cp	BRD-K33551950	radicicol	HSP inhibitor
2255	0	cp	BRD-K60460488	nelfinavir	HIV protease inhibitor
2256	0	cp	BRD-K83794624	pirarubicin	Topoisomerase inhibitor
2257	0	cp	BRD-K55420858	mirin	MRE11A exonuclease inhibitor
2258	0	cp	BRD-K23192422	lestaurtinib	FLT3 inhibitor
2259	0	cp	BRD-K64800655	PHA-793887	CDK inhibitor
2260	0	cp	BRD-K01253243	SB-590885	RAF inhibitor
2261	0	cp	BRD-K13566078	BMS-345541	IKK inhibitor
2262	0	cp	BRD-K99545815	PF-562271	Focal adhesion kinase inhibitor
2263	0	cp	BRD-A80775386	hyperforin	Cyclooxygenase inhibitor
2264	0	cp	BRD-K00184207	GR-206	Aryl hydrocarbon receptor ligand
2265	0	cp	BRD-K95402279	geranylgeraniol	Farnesyltransferase inhibitor
2266	0	cp	BRD-U08759356	EI-346-erlotinib-analog	EGFR inhibitor
2267	0	cp	BRD-K08115555	tyrphostin-AG-1288	TNF production inhibitor
2268	0	cp	BRD-A64228451	terreic-acid	BTK inhibitor
2269	0	cp	BRD-A18497530	5-iodotubercidin	Adenosine kinase inhibitor
2270	0	cp	BRD-K32710582	EI-247	IGF-1 inhibitor
2271	0	cp	BRD-A74904029	EI-231	Casein kinase inhibitor
2272	0	cp	BRD-A55756846	H-7	PKA inhibitor
2273	0	cp	BRD-K77625572	etomoxir	Carnitine palmitoyltransferase inhibitor
2274	0	cp	BRD-K13087974	4,5-dianilinophthalimide	EGFR inhibitor
2275	0	cp	BRD-K32610195	androstenedione	Cytochrome P450 inhibitor
2276	0	cp	BRD-U66370498	androstanol	CAR antagonist
2277	0	cp	BRD-K20986251	lithocholic-acid	FXR antagonist
2278	0	cp	BRD-K33572481	taurodeoxycholic-acid	Bile acid
2279	0	cp	BRD-K43164539	cholic-acid	Bile acid
2280	0	cp	BRD-A01317026	7,8-dihydro-L-biopterin	Dihydroneopterin aldolase inhibitor
2281	0	cp	BRD-A84327315	calcitriol	Vitamin D receptor agonist
2282	0	cp	BRD-A80960055	celastrol	Anti-inflammatory
2283	0	cp	BRD-K04923131	GSK-3-inhibitor-IX	Glycogen synthase kinase inhibitor
2284	0	cp	BRD-A52193669	withaferin-a	IKK inhibitor
2285	0	cp	BRD-A11702965	chromomycin-a3	DNA binding agent
2286	0	cp	BRD-K76698671	HNHA	HDAC inhibitor
2287	0	cp	BRD-K88551539	CAY-10585	HIF modulator
2288	0	cp	BRD-U51951544	ZG-10	JNK inhibitor
2289	0	cp	BRD-U44618005	WH-4023	SRC inhibitor
2290	0	cp	BRD-U25771771	WZ-4-145	EGFR inhibitor
2291	0	cp	BRD-K83972459	JWE-035	Aurora kinase inhibitor
2292	0	cp	BRD-K72420232	WZ-4002	EGFR inhibitor
2293	0	cp	BRD-K38615104	A-443644	AKT inhibitor
2294	0	cp	BRD-K24859147	KIN001-242	Protein kinase inhibitor
2295	0	cp	BRD-K19220233	JNK-9L	JNK inhibitor
2296	0	cp	BRD-A60245366	AS-601245	JNK inhibitor
2297	0	cp	BRD-A24381660	zeranol	Estrogen receptor agonist
2298	0	cp	BRD-K68202742	trichostatin-a	HDAC inhibitor
2299	0	cp	BRD-K04412738	tramadol	Norepinephrine reuptake inhibitor
2300	0	cp	BRD-K54316499	tolterodine	Acetylcholine receptor antagonist
2301	0	cp	BRD-K60160658	tiagabine	GABA uptake inhibitor
2302	0	cp	BRD-K44094599	tacrolimus	Calcineurin inhibitor
2303	0	cp	BRD-K50938786	ropivacaine	Sodium channel blocker
2304	0	cp	BRD-K51485625	ritonavir	HIV protease inhibitor
2305	0	cp	BRD-K70490179	rimcazole	Sigma receptor antagonist
2306	0	cp	BRD-K92870997	pterostilbene	Cyclooxygenase inhibitor
2307	0	cp	BRD-A84134924	pancuronium	Acetylcholine receptor antagonist
2308	0	cp	BRD-A14208071	oxyphenonium	Cholinergic receptor antagonist
2309	0	cp	BRD-K63343048	orlistat	Lipase inhibitor
2310	0	cp	BRD-K05350981	oligomycin-c	ATPase inhibitor
2311	0	cp	BRD-A24543851	nornicotine	Acetylcholine receptor agonist
2312	0	cp	BRD-A12560204	nitrendipine	Calcium channel blocker
2313	0	cp	BRD-K57930253	nitrazepam	Benzodiazepine receptor agonist
2314	0	cp	BRD-K32311154	nifekalant	Potassium channel blocker
2315	0	cp	BRD-A01787639	naftopidil	Adrenergic receptor antagonist
2316	0	cp	BRD-K04710043	hexamethylenebisacetamide	AKT inhibitor
2317	0	cp	BRD-K51671335	sulpiride	Dopamine receptor antagonist
2318	0	cp	BRD-K09471561	levofloxacin	Bacterial DNA gyrase inhibitor
2319	0	cp	BRD-A49172652	lansoprazole	ATPase inhibitor
2320	0	cp	BRD-K30097969	pitavastatin	HMGCR inhibitor
2321	0	cp	BRD-K73991644	isoquercetin	Aldose reductase inhibitor
2322	0	cp	BRD-K59570838	homoveratrylamine	Dopamine analog
2323	0	cp	BRD-K33312228	halometasone	Glucocorticoid receptor agonist
2324	0	cp	BRD-K10860596	granisetron	Serotonin receptor antagonist
2325	0	cp	BRD-A79903587	tegafur	Thymidylate synthase inhibitor
2326	0	cp	BRD-K00673382	famotidine	Histamine receptor antagonist
2327	0	cp	BRD-K40758068	efavirenz	HIV protease inhibitor
2328	0	cp	BRD-K51730347	diphencyprone	Immunostimulant
2329	0	cp	BRD-K73589401	corticosterone	mineralocorticoid receptor agonist
2330	0	cp	BRD-K86595100	chlordiazepoxide	Benzodiazepine receptor agonist
2331	0	cp	BRD-K81169441	cerivastatin	HMGCR inhibitor
2332	0	cp	BRD-K90733503	cefalexin	Bacterial cell wall synthesis inhibitor
2333	0	cp	BRD-K31471398	dihydrexidine	Dopamine receptor agonist
2334	0	cp	BRD-A68888262	azelastine	Histamine receptor antagonist
2335	0	cp	BRD-K39621635	artemether	Antimalarial
2336	0	cp	BRD-A20697603	thiostrepton	FOXM1 inhibitor
2337	0	cp	BRD-A59985574	topotecan	Topoisomerase inhibitor
2338	0	cp	BRD-K56334280	amonafide	Topoisomerase inhibitor
2339	0	cp	BRD-K64785675	TG100-115	-666
2340	0	cp	BRD-A25569250	KI-16425	Lysophosphatidic acid receptor antagonist
2341	0	cp	BRD-K11636097	JNJ-7706621	CDK inhibitor
2342	0	cp	BRD-K16621777	enobosarm	Androgen receptor modulator
2343	0	cp	BRD-K63923597	barasertib	Aurora kinase inhibitor
2344	0	cp	BRD-K24681473	YM-155	Survivin inhibitor
2345	0	cp	BRD-A13807286	HA-14-1	BCL inhibitor
2346	0	cp	BRD-K89162000	tandutinib	FLT3 inhibitor
2347	0	cp	BRD-M07438658	lapatinib	EGFR inhibitor
2348	0	cp	BRD-K49810818	sorafenib	FLT3 inhibitor
2349	0	cp	BRD-K18855837	varenicline	Acetylcholine receptor agonist
2350	0	cp	BRD-K13390322	AT-7519	CDK inhibitor
2351	0	cp	BRD-K15402119	huperzine-a	Acetylcholinesterase inhibitor
2352	0	cp	BRD-A47706533	L-BSO	Glutathione transferase inhibitor
2353	0	cp	BRD-K64310881	MW-STK33-3B	Potassium channel activator
2354	0	cp	BRD-A74771556	nikkomycin	Chitin inhibitor
2355	0	cp	BRD-A00520476	otenzepad	Acetylcholine receptor antagonist
2356	0	cp	BRD-K82143716	flucytosine	Antifungal
2357	0	cp	BRD-K92413528	thiazolidinecarboxylic-acid	Reducing agent
2358	0	cp	BRD-K51941867	LM-1685	Cyclooxygenase inhibitor
2359	0	cp	BRD-K40619305	larixinic-acid	Compound that interacts with metal centers
2360	0	cp	BRD-K87573634	propylpyrazole	Estrogen receptor agonist
2361	0	cp	BRD-A15010982	HU-211	Glutamate receptor antagonist
2362	0	cp	BRD-K32795028	1-benzylimidazole	Thromboxane synthase inhibitor
2363	0	cp	BRD-U82589721	HG-5-113-01	Protein kinase inhibitor
2364	0	cp	BRD-U37049823	HG-6-64-01	RAF inhibitor
2365	0	cp	BRD-K48115423	2-(4-methoxybenzylthio)-6-methylpyrimidin-4-ol	Matrix metalloprotease inhibitor
2366	0	cp	BRD-K29113274	ketoconazole	Sterol demethylase inhibitor
2367	0	cp	BRD-K13810148	givinostat	HDAC inhibitor
2368	0	cp	BRD-K11663430	pyroxamide	HDAC inhibitor
2369	0	cp	BRD-K94144010	cotinine	Nicotine metabolite
2370	0	cp	BRD-A22256192	terazosin	Adrenergic receptor antagonist
2371	0	cp	BRD-K22878149	SB-205607	Delta 1 opioid receptor agonist
2372	0	cp	BRD-A84702196	penicillin	Bacterial cell wall synthesis inhibitor
2373	0	cp	BRD-K59633790	VU-0420363-1	SARS coronavirus 3C-like protease inhibitor
2374	0	cp	BRD-K40213712	SAL-1	Adenosine receptor antagonist
2375	0	cp	BRD-K43149758	myricetin	Androgen receptor agonist
2376	0	cp	BRD-K36153907	KU-C103885	Cystic fibrosis transmembrane conductance regulator inhibitor
2377	0	cp	BRD-A81402010	KU-C103443N	CDC inhibitor
2378	0	cp	BRD-A82096673	KU-C103428N	CDC inhibitor
2379	0	cp	BRD-K51302260	KU-C103871	GSP agonist
2380	0	cp	BRD-K24538644	KUC104502N	-666
2381	0	cp	BRD-K04853698	LDN-193189	Serine/threonine kinase inhibitor
2382	0	cp	BRD-A62025033	temsirolimus	MTOR inhibitor
2383	0	cp	BRD-A15079084	phorbol-12-myristate-13-acetate	PKC activator
2384	0	cp	BRD-A79465854	auranofin	NFkB pathway inhibitor
2385	0	cp	BRD-K32330832	VER-155008	HSP inhibitor
2386	0	cp	BRD-K60623809	SU-11652	Tyrosine kinase inhibitor
2387	0	cp	BRD-K08417745	SID-26681509	Cathepsin inhibitor
2388	0	cp	BRD-K78659596	MLN-2238	Proteasome inhibitor
2389	0	cp	BRD-K19796430	erismodegib	Smoothened receptor antagonist
2390	0	cp	BRD-K86191271	cytosporone-b	NUR77 receptor agonist
2391	0	cp	BRD-K74402642	NSC-632839	Ubiquitin specific protease inhibitor
2392	0	cp	BRD-K83289131	CAY-10618	NAMPT inhibitor
2393	0	cp	BRD-K34581968	BMS-536924	IGF-1 inhibitor
2394	0	cp	BRD-K02950022	BMS-299897	Gamma secretase inhibitor
2395	0	cp	BRD-M86331534	pyrvinium-pamoate	AKT inhibitor
2396	0	cp	BRD-K28296557	AKT-inhibitor-IV	AKT inhibitor
2397	0	cp	BRD-K87142802	veliparib	PARP inhibitor
2398	0	cp	BRD-K99696746	fatostatin	SREBP inhibitor
2399	0	cp	BRD-K93095519	SJ-172550	MDM inhibitor
2400	0	cp	BRD-K17140735	SCH-79797	Proteasome inhibitor
2401	0	cp	BRD-A36630025	SN-38	Topoisomerase inhibitor
2402	0	cp	BRD-K17705806	JTC-801	Opioid receptor antagonist
2403	0	cp	BRD-K43797669	genistein	Tyrosine kinase inhibitor
2404	0	cp	BRD-A34205397	suloctidil	Adrenergic receptor antagonist
2405	0	cp	BRD-A18579359	wiskostatin	Neural Wiskott-Aldrich syndrome protein inhibitor
2406	0	cp	BRD-K54708045	nTZDpa	PPAR receptor agonist
2407	0	cp	BRD-A65550283	ginsenoside	Steroid hormone receptor agonist
2408	0	cp	BRD-K97509413	coumestrol	Estrogen receptor agonist
2409	0	cp	BRD-A80502530	cinobufagin	ATPase inhibitor
2410	0	cp	BRD-A26097136	bulleyaconitine-a	Non-opiod analgesic
2411	0	cp	BRD-K28761384	zuclopenthixol	Dopamine receptor antagonist
2412	0	cp	BRD-K08996725	zolantidine	Histamine receptor antagonist
2413	0	cp	BRD-K68392338	ZK-93426	Benzodiazepine receptor antagonist
2414	0	cp	BRD-K33882852	ZK-93423	Benzodiazepine receptor agonist
2415	0	cp	BRD-K05151076	ZK-164015	Estrogen receptor antagonist
2416	0	cp	BRD-K11373525	ZD-7155	Angiotensin receptor antagonist
2417	0	cp	BRD-K64157027	ZD-2079	Adrenergic receptor agonist
2418	0	cp	BRD-K60174629	z-prolyl-prolinal	Prolyl endopeptidase inhibitor
2419	0	cp	BRD-K12932420	YM-976	Phosphodiesterase inhibitor
2420	0	cp	BRD-K88358234	xaliproden	Serotonin receptor agonist
2421	0	cp	BRD-K28115081	apafant	Platelet activating factor receptor antagonist
2422	0	cp	BRD-K53318339	vinpocetine	Phosphodiesterase inhibitor
2423	0	cp	BRD-A14574269	UB-165	Acetylcholine receptor agonist
2424	0	cp	BRD-K17415526	tyrphostin-AG-835	Protein tyrosine kinase inhibitor
2425	0	cp	BRD-K96778649	tyrphostin-47	EGFR inhibitor
2426	0	cp	BRD-K00959089	thenoyltrifluoroacetone	Chelating agent
2427	0	cp	BRD-K97309399	thiothixene	Dopamine receptor antagonist
2428	0	cp	BRD-A31195449	TCB2	Serotonin receptor agonist
2429	0	cp	BRD-K97118047	4,5,6,7-tetrabromobenzotriazole	Casein kinase inhibitor
2430	0	cp	BRD-K14200658	syrosingopine	Vesicular monoamine transporter inhibitor
2431	0	cp	BRD-A25775766	securinine	GABA receptor antagonist
2432	0	cp	BRD-A49906757	scopolamine	Acetylcholine receptor antagonist
2433	0	cp	BRD-K09963420	saquinavir	HIV protease inhibitor
2434	0	cp	BRD-K63504947	semaxanib	VEGFR inhibitor
2435	0	cp	BRD-K20287671	SU-4312	PDGFR receptor inhibitor
2436	0	cp	BRD-K72895815	SSR-69071	Leukocyte elastase inhibitor
2437	0	cp	BRD-K35430135	SR-59230A	Adrenergic receptor antagonist
2438	0	cp	BRD-A09828896	SKF-81297	Dopamine receptor agonist
2439	0	cp	BRD-K98157055	SIB-1757	Glutamate receptor antagonist
2440	0	cp	BRD-K46469693	SCH-442416	Adenosine receptor antagonist
2441	0	cp	BRD-K94270326	ecopipam	Dopamine receptor antagonist
2442	0	cp	BRD-K85871428	SC-68376	p38 MAPK inhibitor
2443	0	cp	BRD-K41567364	SB-334867	Orexin receptor antagonist
2444	0	cp	BRD-K04414442	SB-222200	Tachykinin antagonist
2445	0	cp	BRD-K77677632	SB-200646	Serotonin receptor antagonist
2446	0	cp	BRD-K06426971	ryuvidine	Histone lysine methyltransferase inhibitor
2447	0	cp	BRD-K21283037	riluzole	Glutamate inhibitor
2448	0	cp	BRD-K04111260	raclopride	Dopamine receptor antagonist
2449	0	cp	BRD-K69556541	ryanodine	Calcium channel blocker
2450	0	cp	BRD-A59174698	ritodrine	Adrenergic receptor agonist
2451	0	cp	BRD-K21853356	RG-14620	EGFR inhibitor
2452	0	cp	BRD-A19053259	pseudopelletierine	Anthelmintic
2453	0	cp	BRD-A37817666	picrotoxin	GABA receptor antagonist
2454	0	cp	BRD-K11399644	phenformin	AMPK activator
2455	0	cp	BRD-K82255054	propofol	GABA receptor agonist
2456	0	cp	BRD-K16977723	PP-3	EGFR inhibitor
2457	0	cp	BRD-K71731651	PNU-120596	Acetylcholine receptor agonist
2458	0	cp	BRD-K10843433	phenylbutazone	Cyclooxygenase inhibitor
2459	0	cp	BRD-K90333595	phentolamine	Adrenergic receptor antagonist
2460	0	cp	BRD-K95435023	PHA-665752	c-Met inhibitor
2461	0	cp	BRD-K40992116	parachlorophenol	Anti-infective
2462	0	cp	BRD-K15567136	papaverine	Phosphodiesterase inhibitor
2463	0	cp	BRD-K00206590	P-1075	ATP channel activator
2464	0	cp	BRD-A39522003	OMDM-2	FAAH inhibitor
2465	0	cp	BRD-K76775527	nimesulide	Cyclooxygenase inhibitor
2466	0	cp	BRD-A66927094	nemonapride	Dopamine receptor antagonist
2467	0	cp	BRD-A21723284	naltriben	Opioid receptor antagonist
2468	0	cp	BRD-K74141488	naftifine	Fungal squalene epoxidase inhibitor
2469	0	cp	BRD-K10136726	tosyllysyl-chloromethyl-ketone	Chymotrypsin inhibitor
2470	0	cp	BRD-K13169950	NSC-3852	HDAC inhibitor
2471	0	cp	BRD-A00758722	noretynodrel	Progestogen hormone
2472	0	cp	BRD-A09161221	nomilin	HSP inhibitor
2473	0	cp	BRD-K78122587	NNC-55-0396	T-type calcium channel blocker
2474	0	cp	BRD-K85015012	NNC-05-2090	GAT inhibitor
2475	0	cp	BRD-A35338386	NECA	Adenosine receptor agonist
2476	0	cp	BRD-K69195780	NAN-190	Serotonin receptor agonist
2477	0	cp	BRD-K60060639	methyllidocaine	antiarrhythmic medication
2478	0	cp	BRD-K06024458	n-arachidonyl-GABA	cannabinoid receptor agonist
2479	0	cp	BRD-K44899736	RO-16-6941	Monoamine oxidase inhibitor
2480	0	cp	BRD-K92428153	mycophenolate-mofetil	Dehydrogenase inhibitor
2481	0	cp	BRD-K90524085	MY-5445	Phosphodiesterase inhibitor
2482	0	cp	BRD-A99449986	MT-21	Caspase activator
2483	0	cp	BRD-K37618799	MRS-1220	Adenosine receptor antagonist
2484	0	cp	BRD-A30590053	MR-16728	Acetylcholine release enhancer
2485	0	cp	BRD-K87696786	LY-456236	Glutamate receptor antagonist
2486	0	cp	BRD-K93201660	ML-7	Myosin light chain kinase inhibitor
2487	0	cp	BRD-K60230970	MG-132	Proteasome inhibitor
2488	0	cp	BRD-A14798026	mestranol	Estrogen receptor agonist
2489	0	cp	BRD-K43245338	MDL-28170	Calpain inhibitor
2490	0	cp	BRD-K28137194	loreclezole	GABA receptor agonist
2491	0	cp	BRD-K03384561	roquinimex	Angiogenesis inhibitor
2492	0	cp	BRD-K69763916	LY-341495	Glutamate receptor antagonist
2493	0	cp	BRD-K33864865	LY-225910	CCK receptor antagonist
2494	0	cp	BRD-A35511923	L-803087	Somatostatin receptor agonist
2495	0	cp	BRD-K05528470	L-745870	Dopamine receptor antagonist
2496	0	cp	BRD-K10176267	L-701252	Glutamate receptor antagonist
2497	0	cp	BRD-A28422058	L-689560	Glutamate receptor antagonist
2498	0	cp	BRD-K40656405	L-165041	PPAR receptor agonist
2499	0	cp	BRD-A43930669	L-368899	Oxytocin receptor antagonist
2500	0	cp	BRD-K49671696	ketanserin	Serotonin receptor antagonist
2501	0	cp	BRD-K37312348	kenpaullone	CDK inhibitor
2502	0	cp	BRD-K93480852	KN-93	Calcium-calmodulin dependent protein kinase inhibitor
2503	0	cp	BRD-K17796732	JWH-015	Cannabinoid receptor agonist
2504	0	cp	BRD-K22010301	JLK-6	Gamma secretase inhibitor
2505	0	cp	BRD-K04546108	JAK3-inhibitor-VI	JAK inhibitor
2506	0	cp	BRD-K95676198	JAK3-inhibitor-V	JAK inhibitor
2507	0	cp	BRD-K52850071	JAK3-Inhibitor-II	JAK inhibitor
2508	0	cp	BRD-K72541103	JAK3-inhibitor-I	JAK inhibitor
2509	0	cp	BRD-K60298136	ITE	Aryl hydrocarbon receptor agonist
2510	0	cp	BRD-K06198550	isorotenone	Mitochondrial complex I inhibitor
2511	0	cp	BRD-K37080523	isoreserpine	Vesicular monoamine transporter inhibitor
2512	0	cp	BRD-A26845397	isamoltan	Adrenergic receptor antagonist
2513	0	cp	BRD-K74305673	IKK-2-inhibitor-V	IKK inhibitor
2514	0	cp	BRD-A97730597	hexylcaine	Sodium channel blocker
2515	0	cp	BRD-K81209159	herniarin	Acetylcholinesterase inhibitor
2516	0	cp	BRD-A00267231	hemado	Adenosine receptor agonist
2517	0	cp	BRD-K27737647	H-89	PKA inhibitor
2518	0	cp	BRD-A38898897	GW-311616	Leukocyte elastase inhibitor
2519	0	cp	BRD-K82983861	GW-0742	PPAR receptor agonist
2520	0	cp	BRD-K68190965	GR-46611	Serotonin receptor agonist
2521	0	cp	BRD-K02283807	GR-32191	Thromboxane receptor antagonist
2522	0	cp	BRD-K11911061	GR-127935	Serotonin receptor antagonist
2523	0	cp	BRD-K11634954	GBR-13069	Dopamine uptake inhibitor
2524	0	cp	BRD-K87049188	fusaric-acid	Dopamine beta hydroxylase inhibitor
2525	0	cp	BRD-A49734948	foliosidine	Plant alkaloid
2526	0	cp	BRD-A13650332	flucloxacillin	Bacterial cell wall synthesis inhibitor
2527	0	cp	BRD-K01095011	finasteride	5-alpha reductase inhibitor
2528	0	cp	BRD-A30815329	felodipine	Calcium channel blocker
2529	0	cp	BRD-K96402602	farnesylthiotriazole	PPMTase inhibitor
2530	0	cp	BRD-K66944906	fraxidin	Carbonic anhydrase inhibitor
2531	0	cp	BRD-K30990140	FR-122047	Cyclooxygenase inhibitor
2532	0	cp	BRD-K44067360	flufenamic-acid	Chloride channel blocker
2533	0	cp	BRD-K30296925	flavokavain-b	Antineoplastic
2534	0	cp	BRD-K63089472	farnesylthioacetic-acid	Inhibitor of methyl esterification of farnesylated proteins
2535	0	cp	BRD-A99411506	esculin	Antioxidant
2536	0	cp	BRD-A39969961	eplerenone	Cytochrome P450 inhibitor
2537	0	cp	BRD-K11927976	ER-27319	Mediator release inhibitor
2538	0	cp	BRD-K27450477	EHNA	Adenosine deaminase inhibitor
2539	0	cp	BRD-K92093830	doxorubicin	Topoisomerase inhibitor
2540	0	cp	BRD-K54759182	dosulepin	Norepinephrine reuptake inhibitor
2541	0	cp	BRD-K71499074	diclofenamide	Carbonic anhydrase inhibitor
2542	0	cp	BRD-A88282067	delcorine	Antiarrhythmic
2543	0	cp	BRD-K62353524	DY-131	Estrogen receptor agonist
2544	0	cp	BRD-K94920105	DR-2313	PARP inhibitor
2545	0	cp	BRD-K39965020	doconexent	PPAR receptor agonist
2546	0	cp	BRD-K26573499	DMAB-anabaseine	Adrenergic receptor agonist
2547	0	cp	BRD-K81521265	dicyclohexylurea	Epoxide hydolase inhibitor
2548	0	cp	BRD-K16508793	diazepam	Benzodiazepine receptor agonist
2549	0	cp	BRD-K76133116	benzydamine	Membrane integrity inhibitor
2550	0	cp	BRD-K06014311	DH-97	Melatonin receptor antagonist
2551	0	cp	BRD-K23623876	decafluorobutane	Contrast agent
2552	0	cp	BRD-A75402480	desoxycorticosterone	Mineralocorticoid receptor agonist
2553	0	cp	BRD-K32526544	DCEBIO	Potassium channel activator
2554	0	cp	BRD-K10065684	dantron	Laxative
2555	0	cp	BRD-A73909368	dactinomycin	RNA polymerase inhibitor
2556	0	cp	BRD-K09132007	D-4476	TGF beta receptor inhibitor
2557	0	cp	BRD-A76093993	cromakalim	Potassium channel activator
2558	0	cp	BRD-K07220430	cinnarizine	Calcium channel blocker
2559	0	cp	BRD-K50422030	clomethiazole	GABA receptor antagonist
2560	0	cp	BRD-K82484965	carmoxirole	Dopamine receptor agonist
2561	0	cp	BRD-K99174507	cardiogenol-c	Cardiomyogenesis inducer
2562	0	cp	BRD-A30437061	camptothecin	Topoisomerase inhibitor
2563	0	cp	BRD-K81876028	CP-93129	Serotonin receptor agonist
2564	0	cp	BRD-K00675675	CL-82198	Metalloproteinase inhibitor
2565	0	cp	BRD-A93000692	ciglitazone	PPAR receptor agonist
2566	0	cp	BRD-A81866333	CGS-21680	Adenosine receptor agonist
2567	0	cp	BRD-K31912990	CGP-71683	Neuropeptide receptor antagonist
2568	0	cp	BRD-A35623999	CGP-37157	L-type calcium channel blocker
2569	0	cp	BRD-A34706053	CGP-12177	Adrenergic receptor agonist
2570	0	cp	BRD-K10870738	CDC	Lipoxygenase inhibitor
2571	0	cp	BRD-K15616905	CCCP	Mitochondrial oxidative phosphorylation uncoupler
2572	0	cp	BRD-K27499107	carbacyclin	IP receptor activator
2573	0	cp	BRD-K17497770	butein	EGFR inhibitor
2574	0	cp	BRD-A58157837	butabindide	Tripeptidyl peptidase inhibitor
2575	0	cp	BRD-A69960130	bromocriptine	Dopamine receptor agonist
2576	0	cp	BRD-K74913225	brinzolamide	Carbonic anhydrase inhibitor
2577	0	cp	BRD-K03440695	boldine	Acetylcholine receptor antagonist
2578	0	cp	BRD-K39111395	BCL2-inhibitor	BCL inhibitor
2579	0	cp	BRD-A16665823	butoconazole	Bacterial cell wall synthesis inhibitor
2580	0	cp	BRD-K25905511	buddleoflavonoloside	Acetylcholinesterase inhibitor
2581	0	cp	BRD-K45479396	BP-554	Serotonin receptor agonist
2582	0	cp	BRD-K31054881	BMY-7378	Adrenergic receptor antagonist
2583	0	cp	BRD-K28075147	biochanin-a	Estrogen receptor agonist
2584	0	cp	BRD-K46018455	bezafibrate	PPAR receptor agonist
2585	0	cp	BRD-K91315211	betahistine	Histamine receptor agonist
2586	0	cp	BRD-K53523901	arctigenin	MEK inhibitor
2587	0	cp	BRD-K36638830	anabasine	Acetylcholine receptor agonist
2588	0	cp	BRD-K85013741	auraptene	Nitric oxide production inhibitor
2589	0	cp	BRD-K73395020	SA-1478088	-666
2590	0	cp	BRD-K29555132	arachidonamide	Cannabinoid receptor agonist
2591	0	cp	BRD-A95513702	androsta-1,4-dien-3,17-dione	Aromatase inhibitor
2592	0	cp	BRD-A28318179	aminomethyltransferase	Nitric oxide synthase inhibitor
2593	0	cp	BRD-K23335153	AMN-082	Glutamate receptor modulator
2594	0	cp	BRD-K89055274	alverine	Muscle relaxant
2595	0	cp	BRD-K87919739	tyrphostin-AG-825	Receptor tyrosine protein kinase inhibitor
2596	0	cp	BRD-K14441456	tyrphostin-AG-556	EGFR inhibitor
2597	0	cp	BRD-K72783841	tyrphostin-AG-555	EGFR inhibitor
2598	0	cp	BRD-K87991767	umbelliferone	Cyclooxygenase inhibitor
2599	0	cp	BRD-K78294846	osthol	Calcium channel blocker
2600	0	cp	BRD-A78360835	cercosporin	Photoactivated toxin
2601	0	cp	BRD-K80451230	zamifenacin	Acetylcholine receptor antagonist
2602	0	cp	BRD-K66353228	zoxazolamine	Myorelaxant
2603	0	cp	BRD-A60294240	tribenoside	Anti-inflammatory
2604	0	cp	BRD-A56012032	thiorphan	Membrane metalloendopeptidase inhibitor
2605	0	cp	BRD-K04210847	tamoxifen	Estrogen receptor antagonist
2606	0	cp	BRD-A10303790	talampicillin	Bacterial cell wall synthesis inhibitor
2607	0	cp	BRD-K00603606	ticlopidine	Purinergic receptor antagonist
2608	0	cp	BRD-K55454768	TAS-301	Calcium-calmodulin dependent protein kinase inhibitor
2609	0	cp	BRD-K50495309	SRC-kinase-inhibitor-I	SRC inhibitor
2610	0	cp	BRD-A72483914	spiroxatrine	Serotonin receptor antagonist
2611	0	cp	BRD-K99595596	salsolinol	Monoamine oxidase inhibitor
2612	0	cp	BRD-A91866971	SQ-29548	Thromboxane receptor antagonist
2613	0	cp	BRD-A58564983	selamectin	Nematocide
2614	0	cp	BRD-K52512893	SC-19220	Prostanoid receptor antagonist
2615	0	cp	BRD-K58299615	RO-90-7501	Beta amyloid inhibitor
2616	0	cp	BRD-K06543683	bisindolylmaleimide-ix	CDK inhibitor
2617	0	cp	BRD-K92760278	riboflavin	Vitamin B
2618	0	cp	BRD-K42142750	retrorsine	Antimitotic
2619	0	cp	BRD-K82941592	rosuvastatin	HMGCR inhibitor
2620	0	cp	BRD-K21733600	rofecoxib	Cyclooxygenase inhibitor
2621	0	cp	BRD-K54411430	robustic-acid	cAMP inhibitor
2622	0	cp	BRD-A77349281	RK-682	Tyrosine phosphatase inhibitor
2623	0	cp	BRD-K37206356	rhamnetin	HDAC inhibitor
2624	0	cp	BRD-A54236247	racephedrine	Adrenergic receptor agonist
2625	0	cp	BRD-K13544237	r(-)-propylnorapomorphine	Dopamine receptor agonist
2626	0	cp	BRD-K40782193	QX-222	Sodium channel blocker
2627	0	cp	BRD-K72222507	quinapril	ACE inhibitor
2628	0	cp	BRD-K50836978	purvalanol-a	CDK inhibitor
2629	0	cp	BRD-A54490543	pirlindole	Monoamine oxidase inhibitor
2630	0	cp	BRD-K19352500	prochlorperazine	Dopamine receptor antagonist
2631	0	cp	BRD-A55913614	primaquine	Antimalarial
2632	0	cp	BRD-A97479839	piperidolate	Acetylcholine receptor antagonist
2633	0	cp	BRD-K26801045	pipamperone	Dopamine receptor antagonist
2634	0	cp	BRD-A48257147	PHCCC	Glutamate receptor agonist
2635	0	cp	BRD-K55191674	benzylpenicillin	Penicillin binding protein inhibitor
2636	0	cp	BRD-K48735772	PD-158780	EGFR inhibitor
2637	0	cp	BRD-K78485176	olmesartan	Angiotensin receptor antagonist
2638	0	cp	BRD-K02953697	naringin	Cytochrome P450 inhibitor
2639	0	cp	BRD-A83855350	naltrexone	Opioid receptor antagonist
2640	0	cp	BRD-K03109492	NSC-663284	CDC inhibitor
2641	0	cp	BRD-K59637651	NSC-119889	Protein synthesis inhibitor
2642	0	cp	BRD-A61470182	n-formylmethionylalanine	macrophage activator
2643	0	cp	BRD-A06784547	MRS-1334	Adenosine receptor antagonist
2644	0	cp	BRD-K68402494	ML-9	Myosin light chain kinase inhibitor
2645	0	cp	BRD-A61793559	metolazone	Carbonic anhydrase inhibitor
2646	0	cp	BRD-K91336023	mesulergine	Dopamine receptor agonist
2647	0	cp	BRD-K15834839	lobendazole	Anthelmintic
2648	0	cp	BRD-A72711497	lasalocid	Bacterial permeability inducer
2649	0	cp	BRD-A84389091	L-655708	GABA receptor inverse agonist
2650	0	cp	BRD-K18036262	L-168049	Glucagon receptor antagonist
2651	0	cp	BRD-A85472596	L-670596	Prostanoid receptor antagonist
2652	0	cp	BRD-K39733634	L-161982	Prostanoid receptor antagonist
2653	0	cp	BRD-A90799790	isradipine	Calcium channel blocker
2654	0	cp	BRD-A10903566	imiloxan	Adrenergic receptor antagonist
2655	0	cp	BRD-A78942461	ICI-118551	Adrenergic receptor antagonist
2656	0	cp	BRD-A78295502	hydroquinine	Antiarrhythmic
2657	0	cp	BRD-A08709697	heliotrine	Pyrrolizidine alkaloid
2658	0	cp	BRD-A65767837	hydrocortisone	Glucocorticoid receptor agonist
2659	0	cp	BRD-A17535965	gelsemine	Acetylcholine receptor antagonist
2660	0	cp	BRD-K39520573	GW-5074	Leucine rich repeat kinase inhibitor
2661	0	cp	BRD-K33818169	GW-3965	LXR agonist
2662	0	cp	BRD-A15415227	GW-1929	PPAR receptor agonist
2663	0	cp	BRD-A29082194	gitoxigenin	ATPase inhibitor
2664	0	cp	BRD-K29582677	flunarizine	Calcium channel blocker
2665	0	cp	BRD-K32977963	eugenol	Androgen receptor antagonist
2666	0	cp	BRD-K04548931	pidorubicine	Topoisomerase inhibitor
2667	0	cp	BRD-K47192521	icosapent	Platelet aggregation inhibitor
2668	0	cp	BRD-K50464341	berbamine	Calmodulin antagonist
2669	0	cp	BRD-K54233340	dorsomorphin	AMPK inhibitor
2670	0	cp	BRD-A04553218	chlorphenamine	Histamine receptor antagonist
2671	0	cp	BRD-K68558722	deracoxib	Cyclooxygenase inhibitor
2672	0	cp	BRD-K43389675	daunorubicin	RNA synthesis inhibitor
2673	0	cp	BRD-A83695761	chromanol	Potassium channel blocker
2674	0	cp	BRD-A64933752	CV-1808	Adenosine receptor agonist
2675	0	cp	BRD-K23913458	coumarin	Vitamin K antagonist
2676	0	cp	BRD-K53263234	CITCO	CAR agonist
2677	0	cp	BRD-K17075857	chloroxine	Opioid receptor antagonist
2678	0	cp	BRD-K41707108	ceramide	Phosphoenolpyruvate carboxylase activator
2679	0	cp	BRD-A15131297	benazepril	ACE inhibitor
2680	0	cp	BRD-K43468059	byssochlamic-acid	Mycotoxin
2681	0	cp	BRD-A05186015	bupropion	Dopamine uptake inhibitor
2682	0	cp	BRD-A37347161	BRL-52537	Opioid receptor agonist
2683	0	cp	BRD-A55484088	BNTX	Opioid receptor antagonist
2684	0	cp	BRD-A16694057	bisphenol-a	PPAR receptor antagonist
2685	0	cp	BRD-K72726508	arcyriaflavin-a	CDK inhibitor
2686	0	cp	BRD-K93080877	Ala-Ala-Phe-CMK	Tripeptidyl peptidase inhibitor
2687	0	cp	BRD-K94512704	spiramide	Dopamine receptor antagonist
2688	0	cp	BRD-K43068349	AMG-9810	TRPV antagonist
2689	0	cp	BRD-K53979406	ALX-5407	Glycine transporter inhibitor
2690	0	cp	BRD-K30020243	aliskiren	Antihypertensive
5401	0	cp	BRD-K83963101	MLN-8054	Aurora kinase inhibitor
5402	0	cp	BRD-K15592317	CP466722	ATM kinase inhibitor
5403	0	cp	BRD-K49669041	BX-912	Pyruvate dehydrogenase kinase inhibitor
5404	0	cp	BRD-K46056750	AZD-7762	CHK inhibitor
5405	0	cp	BRD-K87909389	alvocidib	CDK inhibitor
5406	0	cp	BRD-K85133207	HDAC1-selective	HDAC inhibitor
5407	0	cp	BRD-K77908580	entinostat	HDAC inhibitor
5408	0	cp	BRD-A46393198	tetramisole	Immunostimulant
5409	0	cp	BRD-A68723818	brompheniramine	Histamine receptor antagonist
5410	0	cp	BRD-K50938287	sumatriptan	Serotonin receptor agonist
5411	0	cp	BRD-K28912512	nicotinamide	Protein synthesis stimulant
5412	0	cp	BRD-A23072235	pheniramine	Histamine receptor antagonist
5413	0	cp	BRD-K92778217	mefenamic-acid	Cyclooxygenase inhibitor
5414	0	cp	BRD-K63550407	erythromycin	NFkB pathway inhibitor
5415	0	cp	BRD-K73109821	diazoxide	Potassium channel activator
5416	0	cp	BRD-K55044200	amoxicillin	Penicillin binding protein inhibitor
5417	0	cp	BRD-A09056319	alfuzosin	Adrenergic receptor antagonist
5418	0	cp	BRD-A55815733	phylloquinone	Vitamin K
5419	0	cp	BRD-K15262564	mupirocin	Isoleucyl-tRNA synthetase inhibitor
5420	0	cp	BRD-A75368507	demeclocycline	Bacterial 30S ribosomal subunit inhibitor
5421	0	cp	BRD-K29458283	chlorambucil	DNA inhibitor
5422	0	cp	BRD-A94793051	gestrinone	Progesterone receptor antagonist
5423	0	cp	BRD-K82381502	acetylcholine	Acetylcholine receptor agonist
5424	0	cp	BRD-A80638690	floxuridine	DNA synthesis inhibitor
5425	0	cp	BRD-K32821942	azathioprine	Dehydrogenase inhibitor
5426	0	cp	BRD-A16478930	amcinonide	Glucocorticoid receptor agonist
5427	0	cp	BRD-K02123250	JNJ-38877605	Tyrosine kinase inhibitor
5428	0	cp	BRD-K06335600	tizanidine	Adrenergic receptor agonist
5429	0	cp	BRD-A75479906	rimantadine	Antiviral
5430	0	cp	BRD-A88774919	doxycycline	Bacterial 30S ribosomal subunit inhibitor
5431	0	cp	BRD-K70976396	cefoxitin	Bacterial cell wall synthesis inhibitor
5432	0	cp	BRD-K94830329	ataluren	CFTR channel agonist
5433	0	cp	BRD-A51382177	fosinopril	ACE inhibitor
5434	0	cp	BRD-K72903603	zidovudine	Reverse transcriptase inhibitor
5435	0	cp	BRD-A99833829	bethanechol	Acetylcholine receptor agonist
5436	0	cp	BRD-K11433652	aspirin	Cyclooxygenase inhibitor
5437	0	cp	BRD-A79803969	memantine	Glutamate receptor antagonist
5438	0	cp	BRD-K08273968	griseofulvin	Tubulin inhibitor
5439	0	cp	BRD-K44497846	enalapril	ACE inhibitor
5440	0	cp	BRD-K88868628	iodoacetic-acid	Cysteine peptidase inhibitor
5441	0	cp	BRD-K35458079	edaravone	Nootropic agent
5442	0	cp	BRD-K12002134	megestrol	progesterone receptor agonist
5443	0	cp	BRD-A87848830	bimatoprost	Prostanoid receptor agonist
5444	0	cp	BRD-K90885812	propantheline	Acetylcholine receptor antagonist
5445	0	cp	BRD-K73978287	hydrocortisone	Glucocorticoid receptor agonist
5446	0	cp	BRD-K96037667	norethindrone	Progesterone receptor agonist
5447	0	cp	BRD-K47323024	methapyrilene	Histamine receptor antagonist
5448	0	cp	BRD-A79237180	ascorbic-acid	Antioxidant
5449	0	cp	BRD-A67605442	tetrahydrobiopterin	Nitric oxide stimulant
5450	0	cp	BRD-A31312900	montelukast	Leukotriene receptor antagonist
5451	0	cp	BRD-K95237249	probenecid	Uricosuric blocker
5452	0	cp	BRD-K53790871	triamcinolone	Glucocorticoid receptor agonist
5453	0	cp	BRD-K10016611	pyridine-2-aldoxime	Acetylcholinesterase inhibitor
5454	0	cp	BRD-K57886322	fluocinonide	Glucocorticoid receptor agonist
5455	0	cp	BRD-K11801786	trimidox	Ribonucleotide reductase inhibitor
5456	0	cp	BRD-K21520694	sulfacetamide	PABA antagonist
5457	0	cp	BRD-K48168960	propylthiouracil	Thyroid peroxidase inhibitor
5458	0	cp	BRD-A65013509	oxybutynin	Acetylcholine receptor antagonist
5459	0	cp	BRD-K21680192	mitoxantrone	Topoisomerase inhibitor
5460	0	cp	BRD-K81128206	edrophonium	Acetylcholinesterase inhibitor
5461	0	cp	BRD-A09722536	cyclophosphamide	DNA alkylating agent
5462	0	cp	BRD-K20920669	cromoglicic-acid	Immunosuppressant
5463	0	cp	BRD-K63641886	cefuroxime	Bacterial cell wall synthesis inhibitor
5464	0	cp	BRD-A29260609	acebutolol	Adrenergic receptor antagonist
5465	0	cp	BRD-K79602928	metformin	Insulin sensitizer
5466	0	cp	BRD-K55301415	abiraterone	17,20 lyase inhibitor
5467	0	cp	BRD-K35573744	erbstatin-analog	EGFR inhibitor
5468	0	cp	BRD-A29644307	nomifensine	Dopamine uptake inhibitor
5469	0	cp	BRD-A25576662	streptozotocin	DNA alkylating agent
5470	0	cp	BRD-K98426715	tubacin	HDAC inhibitor
5471	0	cp	BRD-K09186807	KIN001-244	Phosphoinositide dependent kinase inhibitor
5472	0	cp	BRD-K08206212	entecavir	Reverse transcriptase inhibitor
5473	0	cp	BRD-K40255344	tyrphostin-A9	Protein tyrosine kinase inhibitor
5474	0	cp	BRD-K24994810	androstenol	GABA receptor modulator
5475	0	cp	BRD-K50140147	NVP-TAE684	ALK inhibitor
5476	0	cp	BRD-A32161980	carbetocin	Oxytocin receptor agonist
5477	0	cp	BRD-A02333338	cyclopamine	Smoothened receptor antagonist
5478	0	cp	BRD-K22096725	ALW-II-49-7	Ephrin inhibitor
5479	0	cp	BRD-K64881305	ispinesib	Kinesin-like spindle protein inhibitor
5480	0	cp	BRD-K29733039	deforolimus	MTOR inhibitor
5481	0	cp	BRD-K56001384	antimycin-a	ATP synthase inhibitor
5482	0	cp	BRD-K00656370	6-aminochrysene	Transferase inhibitor
5483	0	cp	BRD-K07403598	CAY-10470	NFkB pathway inhibitor
5484	0	cp	BRD-K26818574	BIX-01294	Histone lysine methyltransferase inhibitor
5485	0	cp	BRD-K02130563	panobinostat	HDAC inhibitor
5486	0	cp	BRD-A01826957	xanthinol	Vasodilator
5487	0	cp	BRD-K67637637	olopatadine	Histamine receptor antagonist
5488	0	cp	BRD-A46179541	doxapram	Potassium channel blocker
5489	0	cp	BRD-K67844266	MLN-4924	Nedd activating enzyme inhibitor
5490	0	cp	BRD-K07303502	arachidonyl-trifluoro-methane	Cytosolic phospholipase inhibitor
5491	0	cp	BRD-K12762134	XAV-939	Tankyrase inhibitor
5492	0	cp	BRD-K21672174	RO-28-1675	Glucokinase activator
5493	0	cp	BRD-K08589866	linsitinib	IGF-1 inhibitor
5494	0	cp	BRD-K05653692	DL-PDMP	Glucosyltransferase inhibitor
5495	0	cp	BRD-A67373739	AICA-ribonucleotide	AMPK activator
5496	0	cp	BRD-K32536677	AGK-2	SIRT inhibitor
5497	0	cp	BRD-K00317371	RITA	MDM inhibitor
5498	0	cp	BRD-A18763547	BAX-channel-blocker	Cytochrome C release inhibitor
5499	0	cp	BRD-A79672927	tropicamide	Acetylcholine receptor antagonist
5500	0	cp	BRD-A59303141	quinethazone	Thiazide diuretic
5501	0	cp	BRD-K26979635	NS-3694	Glutamate receptor antagonist
5502	0	cp	BRD-K62056274	quipazine	Serotonin receptor agonist
5503	0	cp	BRD-K21548250	moracizine	Sodium channel blocker
5504	0	cp	BRD-A45543382	metrizamide	Radiopaque medium
5505	0	cp	BRD-A52326238	isogedunin	HSP inhibitor
5506	0	cp	BRD-K86509404	iso-olomoucine	CDK inhibitor
5507	0	cp	BRD-A98299281	velnacrine	cholinesterase inhibitor
5508	0	cp	BRD-A73859745	glycodeoxycholic-acid	Apoptosis stimulant
5509	0	cp	BRD-A30205217	ethotoin	Hydantoin antiepileptic
5510	0	cp	BRD-K42095107	daidzein	Estrogen receptor agonist
5511	0	cp	BRD-K45117373	Y-26763	Potassium channel activator
5512	0	cp	BRD-A19195498	trimipramine	Norepinephrine reuptake inhibitor
1515	0.01	cp	BRD-K75958195	pizotifen	Serotonin receptor antagonist
1516	0.01	cp	BRD-K29950728	clomifene	Estrogen receptor antagonist
1495	0.02	cp	BRD-K73589491	nizatidine	Histamine receptor antagonist
1496	0.02	cp	BRD-K34776109	glimepiride	Insulin secretagogue
1497	0.02	cp	BRD-K47936004	piribedil	Dopamine receptor agonist
1498	0.02	cp	BRD-K06980535	promazine	Dopamine receptor antagonist
1499	0.02	cp	BRD-K28936863	ketotifen	Histamine receptor agonist
1500	0.02	cp	BRD-A26711594	nicardipine	Calcium channel blocker
1483	0.03	cp	BRD-K11540476	EMF-BCA1-64	Caspase inhibitor
1484	0.03	cp	BRD-K32696739	noreleagnine	Monoamine oxidase inhibitor
1485	0.03	cp	BRD-K78633253	EXO-1	ARF inhibitor
1486	0.03	cp	BRD-K10974103	diloxanide	Protein synthesis inhibitor
1487	0.03	cp	BRD-K61250553	loperamide	Opioid receptor agonist
1488	0.03	cp	BRD-A07780951	orciprenaline	Adrenergic receptor agonist
1476	0.04	cp	BRD-K76908866	CP-724714	EGFR inhibitor
1477	0.04	cp	BRD-K24132293	piperlongumine	Glutathione transferase inhibitor
1478	0.04	cp	BRD-A64977602	mirtazapine	Adrenergic receptor antagonist
1479	0.04	cp	BRD-K42500029	CGP-57380	MAP kinase inhibitor
1480	0.04	cp	BRD-A89175223	bisoprolol	Adrenergic receptor antagonist
1481	0.04	cp	BRD-K89997465	chlorpromazine	Dopamine receptor antagonist
1475	0.05	cp	BRD-K96799727	pifithrin-mu	HSP inhibitor
1472	0.06	cp	BRD-K77771411	moxonidine	Imidazoline receptor agonist
1473	0.06	cp	BRD-K79404599	enzastaurin	PKC inhibitor
1462	0.07	cp	BRD-K78431006	crizotinib	ALK inhibitor
1463	0.07	cp	BRD-K35483542	alitretinoin	Retinoid receptor agonist
1464	0.07	cp	BRD-K14765469	vesamicol	Acetylcholinesterase inhibitor
1465	0.07	cp	BRD-K71534238	GW-9508	Free fatty acid receptor agonist
1466	0.07	cp	BRD-K15025317	BAY-11-7821	NFkB pathway inhibitor
1467	0.07	cp	BRD-A36066264	estradiol-benzoate	Estrogen receptor agonist
1468	0.07	cp	BRD-K97158071	droperidol	Dopamine receptor antagonist
1469	0.07	cp	BRD-K60762818	desipramine	Tricyclic antidepressant
1470	0.07	cp	BRD-A05352148	ipratropium	Acetylcholine receptor antagonist
1471	0.07	cp	BRD-A01320529	salmeterol	Adrenergic receptor agonist
1461	0.09	cp	BRD-K79145749	dibenzepin	Norepinephrine reuptake inhibitor
1453	0.11	cp	BRD-K69688083	mestinon	Cholinesterase inhibitor
1454	0.11	cp	BRD-A08877921	cephalotaxine	Protein synthesis inhibitor
1455	0.11	cp	BRD-K47659338	EMD-386088	Serotonin receptor agonist
1456	0.11	cp	BRD-K88742110	BRD-K88742110	HDAC inhibitor
1457	0.11	cp	BRD-A35588707	teniposide	Topoisomerase inhibitor
1458	0.11	cp	BRD-K01292756	pimozide	Dopamine receptor antagonist
1451	0.13	cp	BRD-A41692738	TGX-221	PI3K inhibitor
1440	0.14	cp	BRD-A78877355	nefopam	Cyclooxygenase inhibitor
1441	0.14	cp	BRD-A27554692	altrenogest	Progestogen hormone
1443	0.14	cp	BRD-K37991163	paroxetine	Selective serotonin reuptake inhibitor (SSRI)
1444	0.14	cp	BRD-A31159102	fluoxetine	Selective serotonin reuptake inhibitor (SSRI)
1445	0.14	cp	BRD-A08187463	racecadotril	Enkephalinase inhibitor
1446	0.14	cp	BRD-K55127134	fluphenazine	Dopamine receptor antagonist
1447	0.14	cp	BRD-K90027355	spironolactone	Mineralocorticoid receptor antagonist
1448	0.14	cp	BRD-K93034159	cladribine	Adenosine deaminase inhibitor
1449	0.14	cp	BRD-K66788707	fludarabine	DNA synthesis inhibitor
1450	0.14	cp	BRD-K80738081	resveratrol	Cytochrome P450 inhibitor
1435	0.18	cp	BRD-A71262238	nafadotride	Dopamine receptor antagonist
1436	0.18	cp	BRD-K25224017	pirenperone	Serotonin receptor antagonist
1437	0.18	cp	BRD-K96319534	phentermine	Dopamine uptake inhibitor
1438	0.18	cp	BRD-K14221570	benzopurpurin-4b	HIV entry inhibitor
1439	0.18	cp	BRD-K97061094	azacyclonol	Histamine receptor antagonist
1432	0.2	cp	BRD-K98530306	clonidine	Adrenergic receptor agonist
1425	0.21	cp	BRD-K10705233	GW-405833	Cannabinoid receptor agonist
1426	0.21	cp	BRD-K18779551	bifemelane	Acetylcholine release stimulant
1427	0.21	cp	BRD-K53220666	trimetozine	Sedative
1428	0.21	cp	BRD-A64125466	dehydrocholic-acid	choleretic agent
1429	0.21	cp	BRD-K80639402	SB-258585	Serotonin receptor antagonist
1430	0.21	cp	BRD-A70083328	secnidazole	Acetylcholinesterase inhibitor
1431	0.21	cp	BRD-K67783091	haloperidol	Dopamine receptor antagonist
1424	0.23	cp	BRD-K99029477	prometon	Photosynthesis inhibitor
1419	0.25	cp	BRD-K88304388	dextrorphan	Glutamate receptor antagonist
1420	0.25	cp	BRD-A70649075	sulconazole	Sterol demethylase inhibitor
1421	0.25	cp	BRD-K14993104	bemegride	Chemoreceptor agonist
1422	0.25	cp	BRD-K36616567	doxepin	Histamine receptor antagonist
1423	0.25	cp	BRD-A50311610	meclozine	CAR agonist
1412	0.28	cp	BRD-K81916719	triclabendazole	Microtubule inhibitor
1413	0.28	cp	BRD-K68997413	PF-3845	FAAH inhibitor
1414	0.28	cp	BRD-A84481105	thioridazine	Dopamine receptor antagonist
1415	0.28	cp	BRD-A07440155	labetalol	Adrenergic receptor antagonist
1416	0.28	cp	BRD-K63675182	triflupromazine	Dopamine receptor antagonist
1417	0.28	cp	BRD-K41731458	triclosan	Enoyl-[acyl-carrier-protein] reductase [NADH] inhibitor
1410	0.3	cp	BRD-K44432556	VU-0418946-1	HIF modulator
1408	0.31	cp	BRD-K21667562	AM-404	Cyclooxygenase inhibitor
1402	0.32	cp	BRD-K67277431	picotamide	Thromboxane receptor antagonist
1403	0.32	cp	BRD-A42167015	carteolol	Adrenergic receptor antagonist
1404	0.32	cp	BRD-K75615183	talipexole	Adrenergic receptor agonist
1405	0.32	cp	BRD-K78599730	manumycin-a	Farnesyltransferase inhibitor
1406	0.32	cp	BRD-K42748308	XE-991	Potassium channel blocker
1407	0.32	cp	BRD-K29313308	HDAC3-selective	HDAC inhibitor
1401	0.34	cp	BRD-A04756508	norgestimate	Progesterone receptor agonist
1399	0.35	cp	BRD-K83023055	GR-135531	Melatonin receptor agonist
1400	0.35	cp	BRD-K72703948	ZM-447439	Aurora kinase inhibitor
1391	0.39	cp	BRD-A81177136	KN-62	Calcium-calmodulin dependent protein kinase inhibitor
1392	0.39	cp	BRD-A28746609	paclitaxel	Tubulin inhibitor
1393	0.39	cp	BRD-A31204924	mitotane	Antineoplastic
1394	0.39	cp	BRD-A77291778	cyclopentolate	Acetylcholine receptor antagonist
1395	0.39	cp	BRD-A42759514	ornidazole	Antiprotozoal
1396	0.39	cp	BRD-K07237224	moclobemide	Monoamine oxidase inhibitor
1397	0.39	cp	BRD-K81272440	dantrolene	Calcium channel blocker
1386	0.42	cp	BRD-M72442222	vicriviroc	CC chemokine receptor antagonist
1387	0.42	cp	BRD-K92015269	GBR-12783	Dopamine uptake inhibitor
1388	0.42	cp	BRD-A55946879	BW-B70C	Lipoxygenase inhibitor
1389	0.42	cp	BRD-A75552914	isoxicam	Cyclooxygenase inhibitor
1390	0.42	cp	BRD-K89732114	trifluoperazine	Dopamine receptor antagonist
1385	0.44	cp	BRD-K08252256	diclofenac	Cyclooxygenase inhibitor
1369	0.46	cp	BRD-A74907996	equol	Estrogen receptor agonist
1372	0.46	cp	BRD-K20141153	atomoxetine	Norepinephrine transporter inhibitor
1373	0.46	cp	BRD-A31007383	SDZ-WAG-994	Adenosine receptor agonist
1374	0.46	cp	BRD-K26429091	J-104129	Acetylcholine receptor antagonist
1375	0.46	cp	BRD-K82562631	tolmetin	Cyclooxygenase inhibitor
1376	0.46	cp	BRD-K67439147	SIB-1893	Glutamate receptor antagonist
1377	0.46	cp	BRD-K30867024	SB-216641	Serotonin receptor antagonist
1378	0.46	cp	BRD-K42098891	protriptyline	Tricyclic antidepressant
1379	0.46	cp	BRD-K46862739	metyrapone	Cytochrome P450 inhibitor
1380	0.46	cp	BRD-K13819402	desoxypeganine	Acetylcholinesterase inhibitor
1382	0.46	cp	BRD-K63630713	etacrynic-acid	Sodium/potassium/chloride transporter inhibitor
1362	0.49	cp	BRD-K02227374	milnacipran	Serotonin reuptake inhibitor
1363	0.49	cp	BRD-K82147103	lofepramine	Norepinephrine reuptake inhibitor
1364	0.49	cp	BRD-K96720755	relcovaptan	Vasopressin receptor antagonist
1365	0.49	cp	BRD-A06352418	terfenadine	Histamine receptor antagonist
1366	0.49	cp	BRD-K43796186	benzyl-quinazolin-4-yl-amine	EGFR inhibitor
1367	0.49	cp	BRD-K41895714	AS-605240	PI3K inhibitor
1356	0.53	cp	BRD-K96471533	nitazoxanide	Pyruvate ferredoxin oxidoreductase inhibitor
1357	0.53	cp	BRD-K44353683	nateglinide	Insulin secretagogue
1358	0.53	cp	BRD-K40919711	BAPTA-AM	Potassium channel blocker
1359	0.53	cp	BRD-A71203467	l-stepholidine	Dopamine receptor antagonist
1355	0.54	cp	BRD-K63792901	arecaidine	Acetylcholine receptor agonist
1345	0.56	cp	BRD-K90259198	W-7	Calmodulin antagonist
1346	0.56	cp	BRD-A68281735	REV-5901	Leukotriene receptor antagonist
1347	0.56	cp	BRD-K28307902	flutamide	Androgen receptor antagonist
1348	0.56	cp	BRD-K39746403	erythromycin	NFkB pathway inhibitor
1352	0.56	cp	BRD-K00627859	tubastatin-a	HDAC inhibitor
1353	0.56	cp	BRD-A58048407	nimodipine	Calcium channel blocker
1354	0.56	cp	BRD-K15563106	phloretin	Sodium/glucose cotransporter inhibitor
1341	0.59	cp	BRD-K00486786	RO-08-2750	NGF binding inhibitor
1332	0.6	cp	BRD-K02992638	lamivudine	Nucleoside reverse transcriptase inhibitor
1333	0.6	cp	BRD-A70268693	PG-9	Acetylcholine receptor agonist
1334	0.6	cp	BRD-K18574842	nafcillin	Bacterial cell wall synthesis inhibitor
1335	0.6	cp	BRD-A39255369	DCPIB	Chloride channel blocker
1338	0.6	cp	BRD-K86204871	terconazole	Sterol demethylase inhibitor
1339	0.6	cp	BRD-A80793822	pemoline	Dopamine receptor agonist
1328	0.63	cp	BRD-K32501161	vanoxerine	Dopamine uptake inhibitor
1329	0.63	cp	BRD-K45861246	azaperone	Dopamine receptor antagonist
1330	0.63	cp	BRD-K62200014	anagrelide	Phosphodiesterase inhibitor
1331	0.63	cp	BRD-K25311561	KU-55933	ATM kinase inhibitor
1324	0.67	cp	BRD-K01649396	indatraline	Norepinephrine transporter inhibitor
1325	0.67	cp	BRD-K13725475	rhodomyrtoxin	Cytotoxic agent
1326	0.67	cp	BRD-K88789588	letrozole	Aromatase inhibitor
1319	0.7	cp	BRD-K68873215	phosphodiesterase-V-inhibitor-II	Phosphodiesterase inhibitor
1312	0.74	cp	BRD-K10466330	AVA	Nucleophosmin inhibitor
1315	0.74	cp	BRD-K02965346	SU-11274	Hepatocyte growth factor receptor inhibitor
1316	0.74	cp	BRD-K63165456	norcyclobenzaprine	Adrenergic receptor agonist
1317	0.74	cp	BRD-A47633927	NPC-15199	ICAM1 antagonist
1318	0.74	cp	BRD-K66707493	lawsone	Coloring agent
1304	0.78	cp	BRD-K04430056	7-nitroindazole	nitric oxide synthase inhibitor
1305	0.78	cp	BRD-K26241953	piceatannol	SYK inhibitor
1306	0.78	cp	BRD-M45964048	verteporfin	Photosensitizing agent
1307	0.78	cp	BRD-K60770992	pergolide	Dopamine receptor agonist
1308	0.78	cp	BRD-K50128260	sildenafil	Phosphodiesterase inhibitor
1296	0.81	cp	BRD-K55034111	pefloxacin	Bacterial DNA gyrase inhibitor
1297	0.81	cp	BRD-K64994968	progesterone	Progesterone receptor agonist
1298	0.81	cp	BRD-K18742343	H-8	PKA inhibitor
1285	0.85	cp	BRD-K63151507	MNITMT	Lymphocyte inhibitor
1286	0.85	cp	BRD-A41145729	methoprene-acid	Retinoid receptor agonist
1287	0.85	cp	BRD-K17110974	aristolochic-acid	Phospholipase inhibitor
1288	0.85	cp	BRD-K98490050	amsacrine	Topoisomerase inhibitor
1283	0.87	cp	BRD-A11813248	AM-92016	Potassium channel blocker
1277	0.88	cp	BRD-K61829047	7b-cis	Exportin antagonist
1278	0.88	cp	BRD-K88429204	pyrimethamine	Dihydrofolate reductase inhibitor
1279	0.88	cp	BRD-K02590140	O-2050	Cannabinoid receptor antagonist
1280	0.88	cp	BRD-A82656074	naltrindole	Opioid receptor antagonist
1281	0.88	cp	BRD-A28856712	tetryzoline	Adrenergic receptor agonist
1282	0.88	cp	BRD-K74212935	ergocryptine	Dopamine agonist
1272	0.9	cp	BRD-A35033682	eriodictyol	Cytochrome P450 inhibitor
1273	0.9	cp	BRD-K90574421	ipsapirone	Serotonin receptor agonist
1270	0.91	cp	BRD-K95885906	quercetagetin	PIM inhibitor
1271	0.91	cp	BRD-K74133369	oligomycin-a	ATP synthase inhibitor
1267	0.92	cp	BRD-A83431637	resmethrin	Cytochrome P450 inhibitor
1268	0.92	cp	BRD-K32830106	guanfacine	Adrenergic receptor agonist
1254	0.95	cp	BRD-K60219430	serdemetan	MDM inhibitor
1255	0.95	cp	BRD-A31801025	formestane	Aromatase inhibitor
1256	0.95	cp	BRD-K80725821	RS-16566	Serotonin receptor antagonist
1257	0.95	cp	BRD-K34330170	rotenonic-acid	Retinoid receptor antagonist
1258	0.95	cp	BRD-A94709349	metaxalone	Muscle relaxant
1259	0.95	cp	BRD-K63533170	AM-630	Cannabinoid receptor antagonist
1260	0.95	cp	BRD-K59058766	chlorprothixene	Dopamine receptor antagonist
1262	0.95	cp	BRD-K51313569	palbociclib	CDK inhibitor
1263	0.95	cp	BRD-K62810658	PD-98059	MEK inhibitor
1250	0.98	cp	BRD-K06926592	tretinoin	Retinoid receptor agonist
1240	0.99	cp	BRD-A39052811	mosapride	Serotonin receptor agonist
1241	0.99	cp	BRD-K19894101	MST-312	Telomerase inhibitor
1242	0.99	cp	BRD-K25741894	skimmianine	Acetylcholinesterase inhibitor
1243	0.99	cp	BRD-K88677950	PD-198306	MAP kinase inhibitor
1244	0.99	cp	BRD-K62289640	lylamine	Cannabinoid receptor agonist
1245	0.99	cp	BRD-A71157293	fursultiamine	Vitamin B
1247	0.99	cp	BRD-K20655524	mefexamide	Psychoactive drug
1248	0.99	cp	BRD-K37194137	III606050	Cytochrome P450 inhibitor
1249	0.99	cp	BRD-K26657438	imiquimod	TLR agonist
1231	1.02	cp	BRD-K99063460	didanosine	Nucleoside reverse transcriptase inhibitor
1232	1.02	cp	BRD-K19525698	ozagrel	Thromboxane synthase inhibitor
1233	1.02	cp	BRD-K33860217	CP-94253	Serotonin receptor agonist
1234	1.02	cp	BRD-K95851186	CGP-13501	GABA receptor modulator
1219	1.06	cp	BRD-K89687904	PKCbeta-inhibitor	PKC inhibitor
1220	1.06	cp	BRD-K09635314	M-3M3FBS	phospholipase activator
1221	1.06	cp	BRD-K90789829	nefazodone	Adrenergic inhibitor
1210	1.09	cp	BRD-K56745457	azauridine	Antiviral
1211	1.09	cp	BRD-K95921201	reserpine	Vesicular monoamine transporter inhibitor
1212	1.09	cp	BRD-K31792052	pifithrin	Interleukin receptor antagonist
1213	1.09	cp	BRD-K23583188	lavendustin-a	EGFR inhibitor
1214	1.09	cp	BRD-K05181463	L-741626	Dopamine receptor antagonist
1215	1.09	cp	BRD-K52394958	GR-159897	Tachykinin antagonist
1216	1.09	cp	BRD-A73581086	ergometrine	Adrenergic receptor agonist
1217	1.09	cp	BRD-K48722258	dilazep	Adenosine reuptake inhibitor
1200	1.13	cp	BRD-A61856038	tremulacin	Lipoxygenase inhibitor
1201	1.13	cp	BRD-K15868788	SDZ-205-557	Serotonin receptor antagonist
1202	1.13	cp	BRD-K80970344	pyrrolidine-dithiocarbamate	NFkB pathway inhibitor
1203	1.13	cp	BRD-K27871032	lysergol	Ergoline alkaloid
1195	1.16	cp	BRD-A11990600	lorazepam	Benzodiazepine receptor agonist
1196	1.16	cp	BRD-A87387433	cefpodoxime	Bacterial cell wall synthesis inhibitor
1197	1.16	cp	BRD-A41451487	PK-11195	Benzodiazepine receptor antagonist
1198	1.16	cp	BRD-K40530731	hyoscyamine	Acetylcholine receptor antagonist
1199	1.16	cp	BRD-K49657628	tyrphostin-AG-18	EGFR inhibitor
1188	1.2	cp	BRD-K18757346	U-46619	Thromboxane receptor agonist
1189	1.2	cp	BRD-K31987754	oleylethanolamide	Cannabinoid receptor agonist
1190	1.2	cp	BRD-A70407468	PSB-36	Adenosine receptor antagonist
1187	1.21	cp	BRD-A02189320	met-leu-phe	-666
1183	1.23	cp	BRD-K45401373	betulinic-acid	Apoptosis stimulant
1184	1.23	cp	BRD-A48720949	testosterone	androgen receptor agonist
1185	1.23	cp	BRD-A82590476	SDZ-NKT-343	Tachykinin antagonist
1186	1.23	cp	BRD-K53561341	KIN001-220	Aurora kinase inhibitor
1180	1.24	cp	BRD-A43150328	penicillic-acid	other antibiotic
1182	1.24	cp	BRD-K05396879	15-delta-prostaglandin-j2	PPAR receptor agonist
1175	1.27	cp	BRD-K06753942	nobiletin	MEK inhibitor
1176	1.27	cp	BRD-A82371568	clofarabine	Ribonucleoside reductase inhibitor
1177	1.27	cp	BRD-K95309561	dienestrol	Estrogen receptor agonist
1173	1.29	cp	BRD-A22380646	pantoprazole	ATPase inhibitor
1169	1.3	cp	BRD-K44442813	pidotimod	Interferon receptor agonist
1170	1.3	cp	BRD-K49668410	clarithromycin	Bacterial 50S ribosomal subunit inhibitor
1171	1.3	cp	BRD-K89375097	pirenzepine	Acetylcholine receptor antagonist
1172	1.3	cp	BRD-K89839824	raltitrexed	Thymidylate synthase inhibitor
1165	1.33	cp	BRD-K99964838	bosutinib	ABL inhibitor
1158	1.34	cp	BRD-K33106058	cytarabine	Ribonucleotide reductase inhibitor
1159	1.34	cp	BRD-K66792149	quinoclamine	Algicide
[truncated: 429 more rows]
